# Supplementary material for: Structural dynamics of a thermally silent triiron(ii) spin crossover defect grid complex
Source: Royal Society of Chemistry journal article supplement (doi:10.1039/d3dt02067c), 2023-01-01
Supplement: d3dt02067c15.pdf [file d3dt02067c15.pdf]

# Structural Dynamics of a Thermally Silent Fe<sup>II</sup> Spin Crossover Defect-Grid Complex

Jose de Jesus Velazquez-Garcia<sup>a\*</sup>, Krishnayan Basuroy<sup>a</sup>, Darina Storozhuk<sup>a</sup>, Joanne Wong<sup>b</sup>, Serhiy Demeshko<sup>b</sup>, Franc Meyer<sup>b</sup>, Robert Henning<sup>c</sup> and Simone Teichert<sup>a,d</sup>

<sup>a</sup>Photon Science - Structural Dynamics in Chemical Systems, Deutsches Elektronen-Synchrotron DESY, Notkestraße 85, Hamburg, 22607, Germany

<sup>b</sup>Institut für Anorganische Chemie, Georg-August-Universität Göttingen, Tammannstraße 4, Göttingen, 37077, Germany

<sup>c</sup>Center for Advanced Radiation Sources, The University of Chicago, Argonne National Laboratory, 9700 South Cass Ave, Lemont, Illinois, 90439, USA

<sup>d</sup>Institut für Röntgenphysik, Georg-August-Universität Göttingen, Friedrich-Hund-Platz 1, Göttingen, 37077, Germany

## Characterization

Table S1. Crystal data and structure-refinement parameters of **FE3** at 100K.

|                                                |                                    |
|------------------------------------------------|------------------------------------|
| Temperature                                    | 100K                               |
| Empirical Formula                              | C100 H74 B4 F16 Fe3 N28            |
| Crystal colour/habit                           | Black/block                        |
| Crystal size (mm)                              | (0.090x0.050x0.030)                |
| Crystallizing solvent                          | Acetonitrile                       |
| Crystal system/ Space group                    | Triclinic/ P-1                     |
| <i>a</i> (Å)                                   | 14.010 (3)                         |
| <i>b</i> (Å)                                   | 14.480 (3)                         |
| <i>c</i> (Å)                                   | 24.320 (5)                         |
| $\alpha$ (°)                                   | 91.520 (3)                         |
| $\beta$ (°)                                    | 95.920 (3)                         |
| $\gamma$ (°)                                   | 107.67 (3)                         |
| Volume (Å <sup>3</sup> )                       | 4467.1 (18)                        |
| <i>Z</i> / <i>Z'</i>                           | 2/1                                |
| Molecular Weight                               | 2182.66                            |
| Calculated density (g/cm <sup>3</sup> )        | 1.553                              |
| F(000)                                         | 2224.0                             |
| Radiation                                      | Synchrotron ( $\lambda=0.61990$ Å) |
| $\theta$ range (°)                             | 1.290/22.648                       |
| Scan type                                      | $\varphi$                          |
| Measured reflections                           | 62278                              |
| Unique reflections                             | 16815                              |
| Observed reflections<br>[ $ F  > 4\sigma(F)$ ] | 16189                              |
| Final R (%)                                    | 5.31                               |
| wR2 (%)                                        | 14.84                              |
| Good-of-fit on F <sup>2</sup> (S)              | 1.049                              |
| $\Delta\rho$ max (e. Å <sup>-3</sup> )         | 2.05                               |
| $\Delta\rho$ min (e. Å <sup>-3</sup> )         | -0.94                              |
| No of restraints/parameters                    | 208/1483                           |
| Data [ $ F  > 4\sigma(F)$ ]-to-parameter ratio | 10.92:1                            |

Table S2. Selected bond lengths and bond angles for compound **FE3** at 100K.

| Bond lengths (Å) |           | Bond angles (°) |             |               |             |
|------------------|-----------|-----------------|-------------|---------------|-------------|
| Fe(A)-N1         | 1.979 (2) | N8-Fe(A)-N7     | 79.84 (8)   | N21-Fe(B)-N16 | 96.55 (9)   |
| Fe(A)-N2         | 1.908 (2) | N8-Fe(A)-N1     | 98.53 (9)   | N21-Fe(B)-N18 | 88.06 (9)   |
| Fe(A)-N3         | 1.973 (2) | N8-Fe(A)-N2     | 174.26 (8)  | N21-Fe(B)-N19 | 160.73 (10) |
| Fe(A)-N7         | 2.003 (2) | N8-Fe(A)-N3     | 101.05 (9)  | N20-Fe(B)-N16 | 105.16 (10) |
| Fe(A)-N8         | 1.907 (2) | N8-Fe(A)-N9     | 79.95 (8)   | N20-Fe(B)-N18 | 94.64 (10)  |
| Fe(A)-N9         | 2.026 (2) | N7-Fe(A)-N9     | 159.78 (8)  | N20-Fe(B)-N17 | 174.42 (10) |
| Fe(B)-N16        | 2.003 (2) | N1-Fe(A)-N7     | 94.64 (9)   | N20-Fe(B)-N19 | 81.02 (11)  |
| Fe(B)-N17        | 1.908 (2) | N1-Fe(A)-N9     | 87.70 (9)   | N20-Fe(B)-N21 | 79.77 (10)  |
| Fe(B)-N18        | 2.001 (2) | N2-Fe(A)-N7     | 94.52 (8)   | N14-Fe(C)-N15 | 77.19 (9)   |
| Fe(B)-N19        | 1.981 (2) | N2-Fe(A)-N1     | 80.70 (9)   | N14-Fe(C)-N10 | 121.04 (8)  |
| Fe(B)-N20        | 1.889 (2) | N2-Fe(A)-N3     | 79.71 (9)   | N14-Fe(C)-N12 | 88.09 (8)   |
| Fe(B)-N21        | 1.974 (2) | N2-Fe(A)-N9     | 105.66 (8)  | N14-Fe(C)-N13 | 72.79 (9)   |
| Fe(C)-N10        | 2.149 (2) | N3-Fe(A)-N7     | 87.79 (9)   | N15-Fe(C)-N10 | 101.77 (8)  |
| Fe(C)-N11        | 2.115 (2) | N3-Fe(A)-N1     | 160.39 (8)  | N15-Fe(C)-N12 | 91.47 (9)   |
| Fe(C)-N12        | 2.268 (2) | N3-Fe(A)-N9     | 96.73 (8)   | N15-Fe(C)-N13 | 149.83 (8)  |
| Fe(C)-N13        | 2.298 (2) | N18-Fe(B)-N16   | 160.16 (10) | N11-Fe(C)-N14 | 150.64 (9)  |
| Fe(C)-N14        | 2.122 (2) | N17-Fe(B)-N16   | 80.34 (10)  | N11-Fe(C)-N15 | 124.20 (8)  |
| Fe(C)-N15        | 2.146 (3) | N17-Fe(B)-N18   | 79.84 (11)  | N11-Fe(C)-N10 | 77.38 (8)   |
|                  |           | N17-Fe(B)-N19   | 98.54 (10)  | N11-Fe(C)-N12 | 72.81 (8)   |
|                  |           | N17-Fe(B)-N21   | 100.73 (9)  | N11-Fe(C)-N13 | 85.01 (8)   |
|                  |           | N19-Fe(B)-N16   | 86.94 (9)   | N10-Fe(C)-N12 | 149.87 (8)  |
|                  |           | N19-Fe(B)-N18   | 95.05 (9)   | N10-Fe(C)-N13 | 91.23 (9)   |
|                  |           |                 |             | N12-Fe(C)-N13 | 90.50 (9)   |

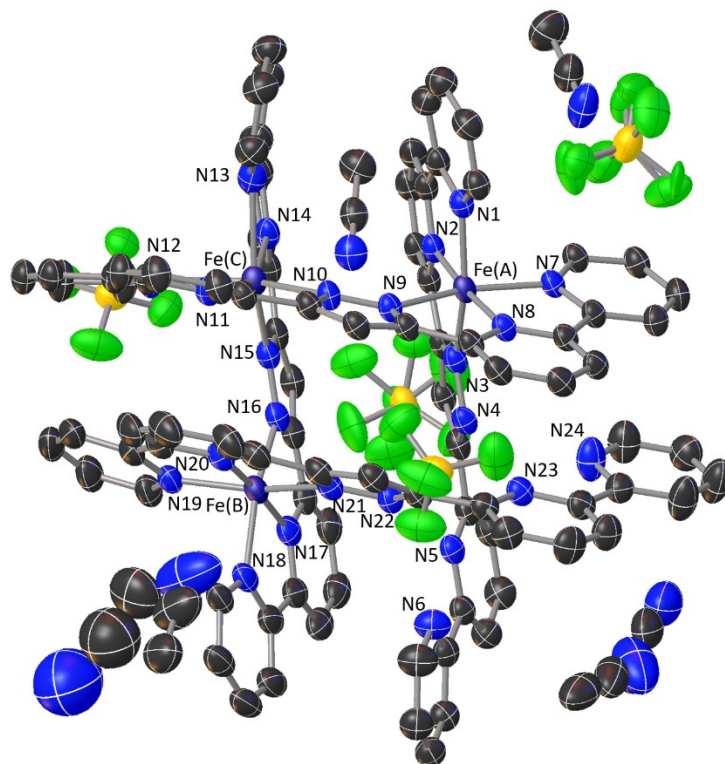

Figure S1. Asymmetric unit of the **FE3** grid at 100K. Hydrogen atoms are omitted for clarity.

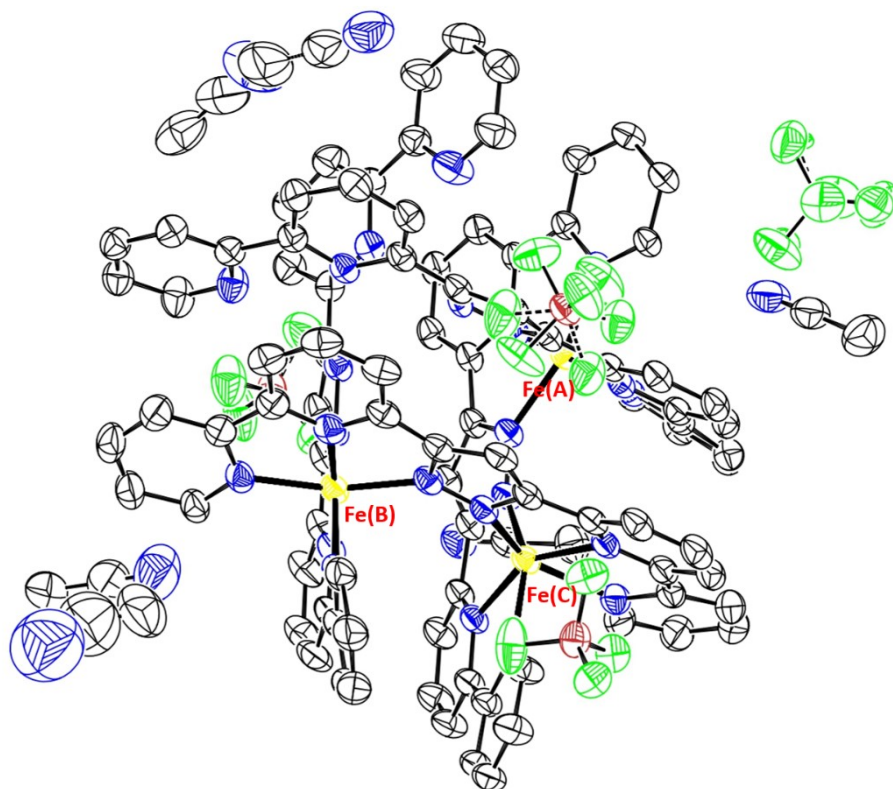

Figure S2. Thermal ellipsoid plot (50% of probability) for **FE3** at 100K. Hydrogen atoms are omitted for clarity.

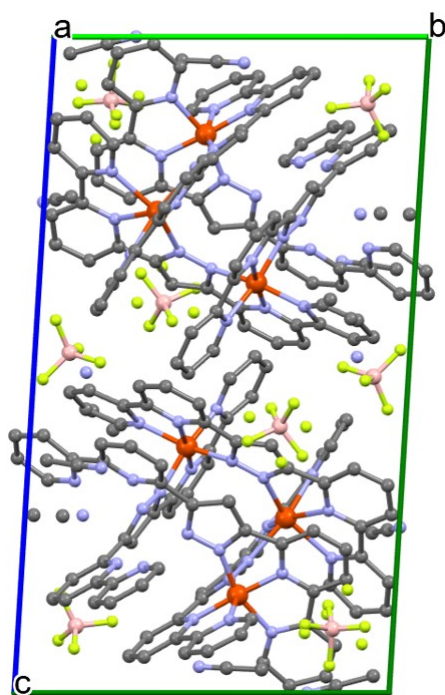

Figure S3. Packing of molecules down crystallographic '*a*' axis. Hydrogen atoms are omitted for clarity.

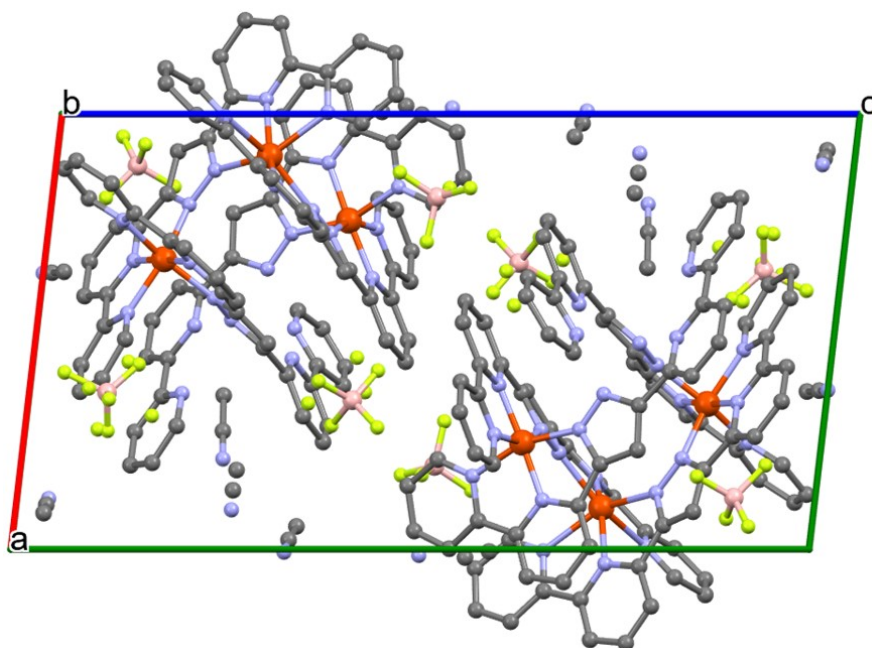

Figure S4. Packing of molecules down crystallographic '*b*' axis. Hydrogen atoms are omitted for clarity.

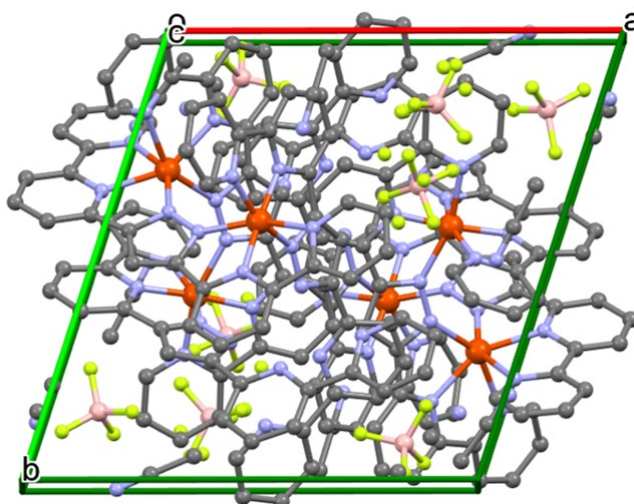

Figure S5. Packing of molecules down crystallographic '*c*' axis. Hydrogen atoms are omitted for clarity.



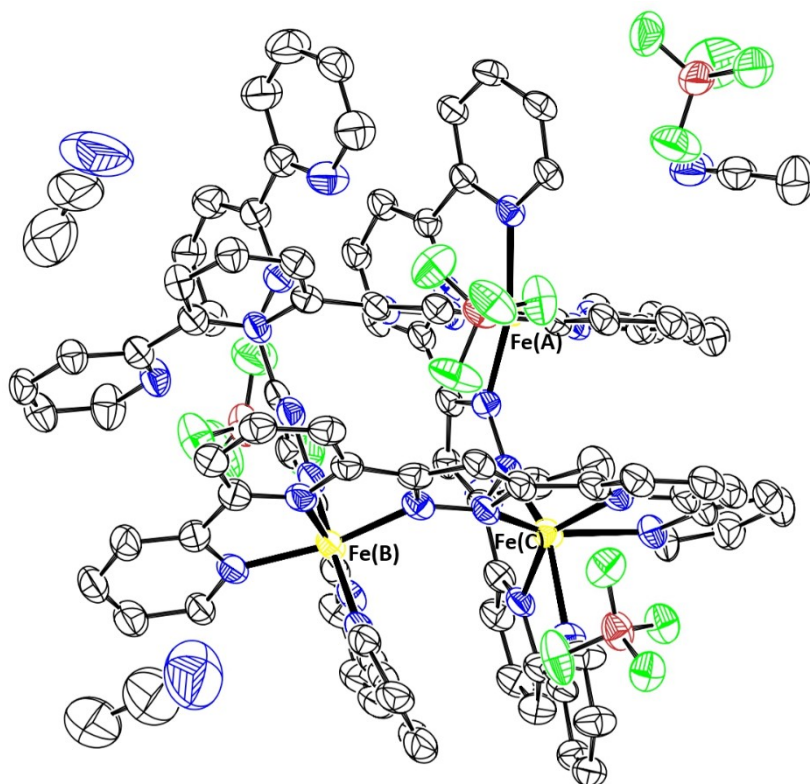

Figure S6. Thermal ellipsoid plot (50% of probability) for **FE3** for the -500ps data. Hydrogen atoms are omitted for clarity.

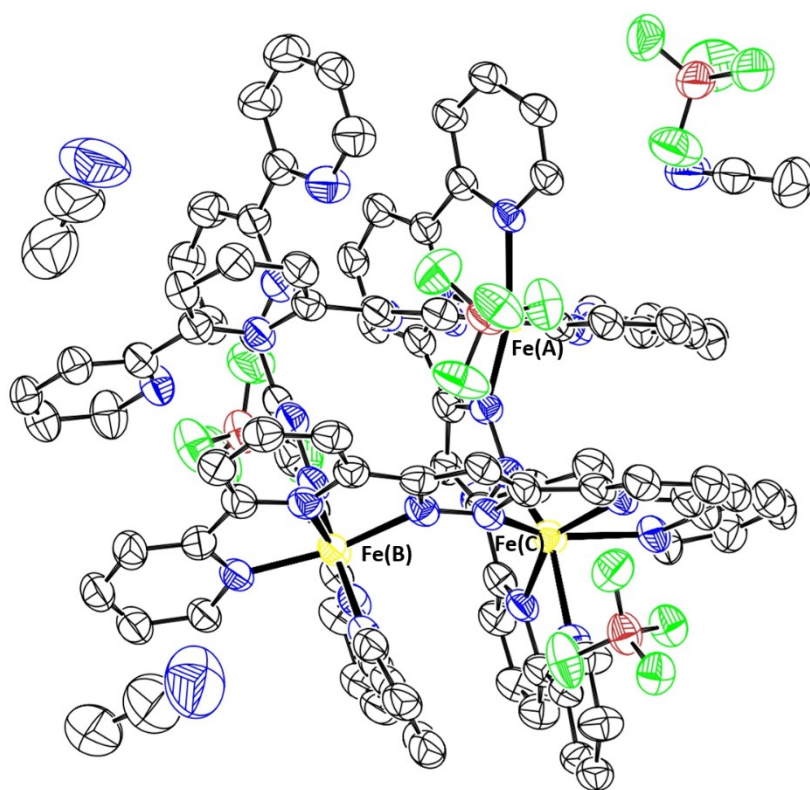

Figure S7. Thermal ellipsoid plot (50% of probability) for **FE3** for the 200ps data. Hydrogen atoms are omitted for clarity.

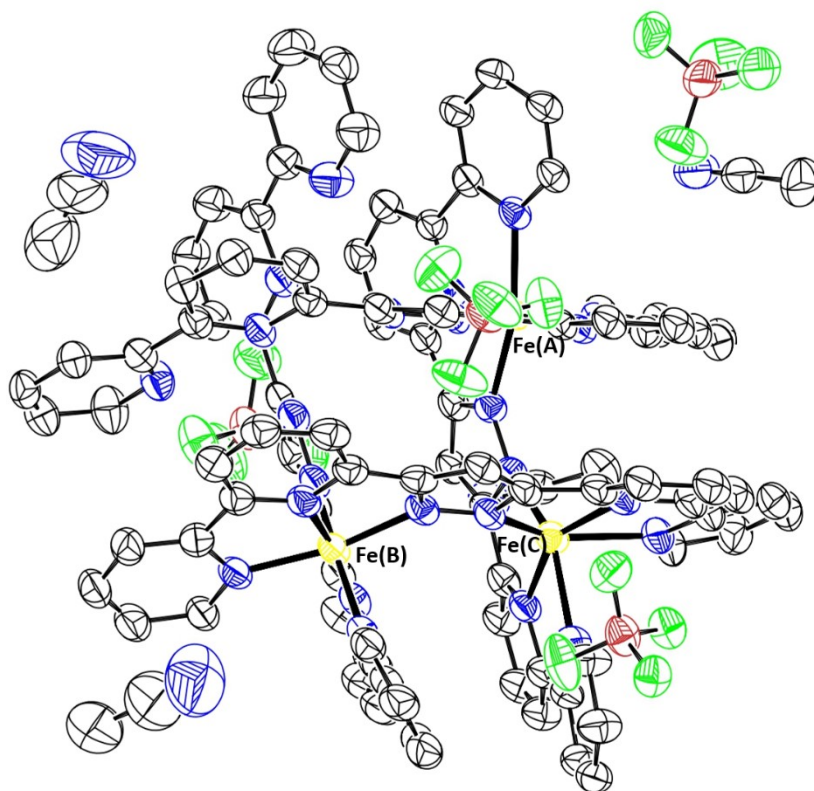

Figure S8. Thermal ellipsoid plot (50% of probability) for **FE3** for the 500ps data. Hydrogen atoms are omitted for clarity.

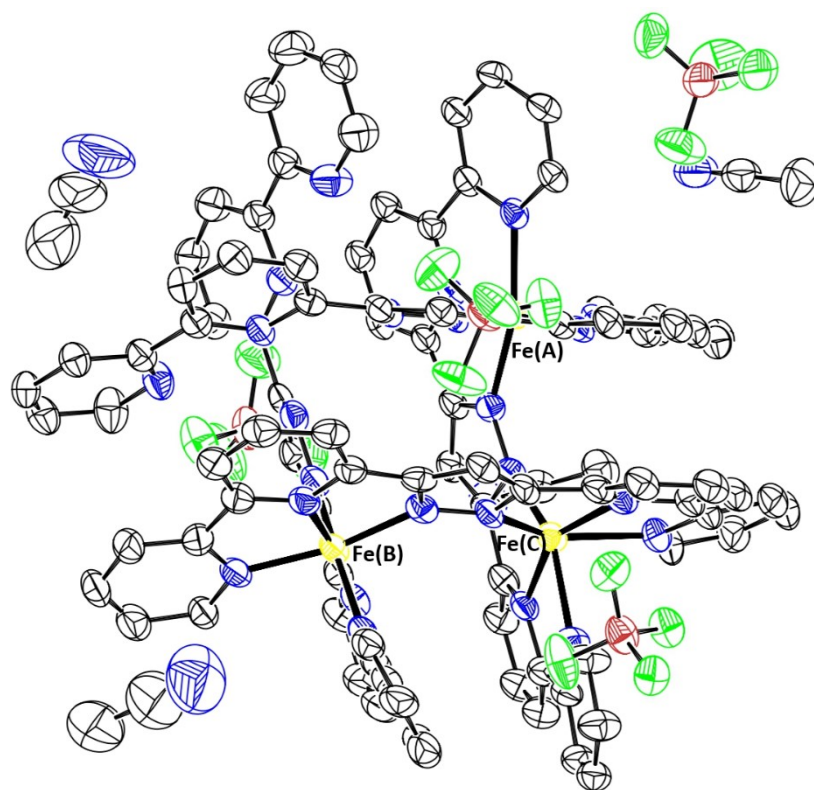

Figure S9. Thermal ellipsoid plot (50% of probability) for **FE3** for the 800ps data. Hydrogen atoms are omitted for clarity.

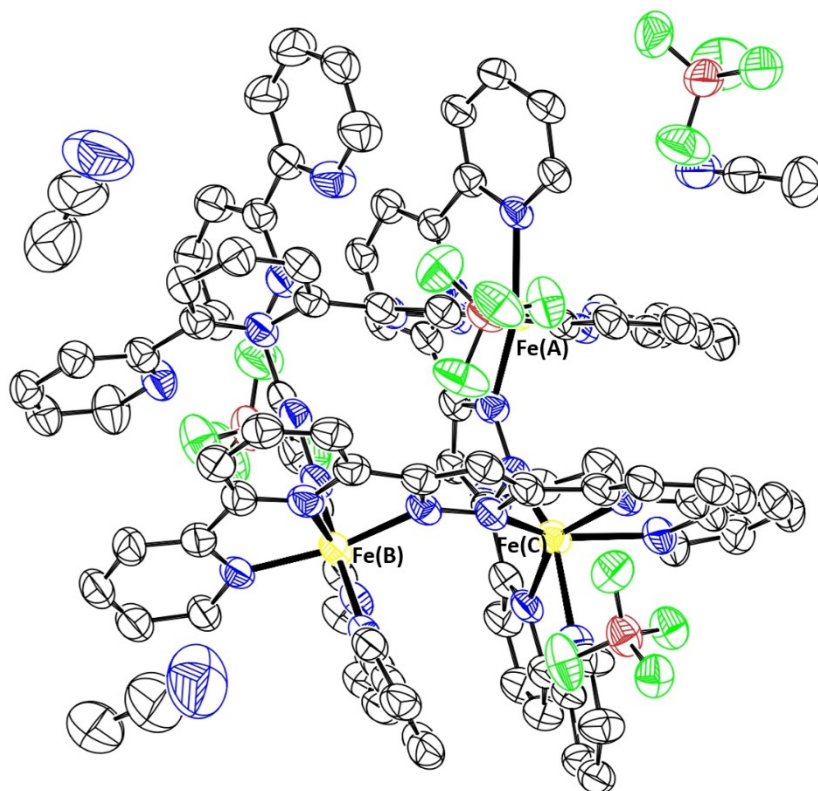

Figure S10. Thermal ellipsoid plot (50% of probability) for **FE3** for the 1ns data. Hydrogen atoms are omitted for clarity.

## Structural Analysis

The Octadist program<sup>1</sup> was used to determine the <Fe-N> bond length and the angular distortion parameter that describes the octahedral coordination environment of the metal centres in the **FE3** grid. The angular distortion parameter,  $\Theta$ , is the sum of the deviations from 60° of the 24 N-Fe-N angles, six per pseudo three-fold axis, measured on a projection of opposite triangular faces of the {FeN<sub>6</sub>} octahedron, orientated by superimposing the face centroids (Figure S1).<sup>2,3</sup>

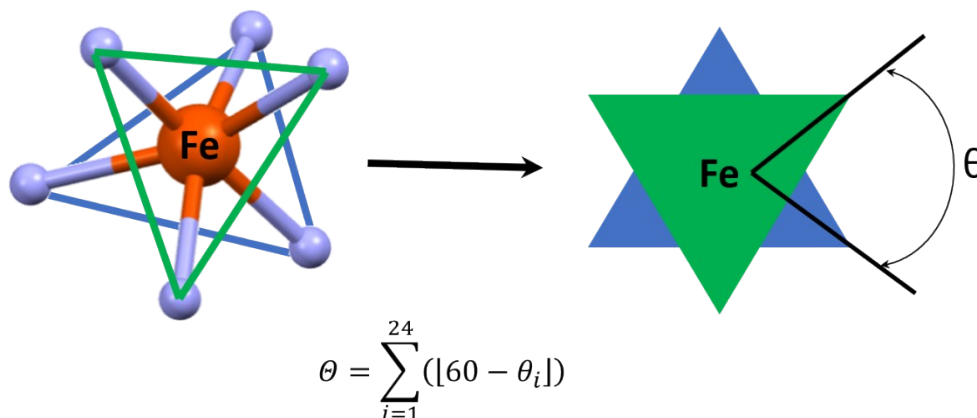

Figure S11. Environment of Fe<sup>II</sup> ions and definition of the  $\theta$  angle and the angular distortion parameter ( $\Theta$ ).<sup>2,3</sup>

For comparison, continuous shape measurements (CShM) were also used to characterise the relative deviation of the metal coordination spheres in **FE3** from ideal polyhedra described by a particular point symmetry group (Table S2).<sup>4</sup> Mathematically, CShM of the coordination polyhedron Q with the geometric centre  $\vec{q}_0$  relative to an ideal polyhedron P is expressed as:

$$S_Q = \min \left[ \frac{\sum_{i=1}^N |\vec{q}_i - \vec{p}_i|^2}{\sum_{i=1}^N |\vec{q}_i - \vec{q}_0|^2} \right] \times 100 \quad (\text{S1})$$

where  $\vec{q}_i$  and  $\vec{p}_i$  are the position vectors for atoms of two polyhedra. CShM relative to an ideal octahedron (S(Oh)) and an ideal trigonal prism (S(itp)) were calculated using the SHAPE program.<sup>5</sup> The calculation of S(Oh) and S(itp) were performed for all crystallographic-symmetry independent metal atoms.

It is well known that the {FeN<sub>6</sub>} coordination sphere of LS Fe<sup>II</sup> ions is more regular, i.e., closer to an ideal octahedron. Therefore, the S(Oh) parameter is small and closer to 0, while the parameter S(itp) >> 0. Contrarily, Fe<sup>II</sup> ions in the HS state are characterised by a more irregular structure with structural parameters S(Oh) >> 0 and S(itp) closer to zero.





## Estimate of Temperature Difference

A method for estimating the temperature difference between two different data sets collected at different temperatures is obtained from temperature-Wilson plots. The plots are obtained by a scale-factor refinement of the low temperature data (100K) with the high-temperature data (310K) structural model and plotting the  $\ln(I^{100K}/I^{310K})$ . The slope of the dependence of  $\ln(I^{100K}/I^{310K})$  with  $(\sin\theta/\lambda)^2$  gives the overall increase of isotropic atomic motion,  $\Delta B$  (equation S2), which is associated with temperature difference between the data sets.<sup>6</sup>

$$\ln\left(\frac{I^{100K}}{I^{310K}}\right) = -2\Delta B^{100K-310K}(\sin\theta/\lambda)^2 \quad (\text{S2})$$

An analogous equation is used to calculate the temperature increase during the photo-crystallographic experiments. The energy deposited by the laser pulse largely exceeds the energy necessary for the LS to HS transition, which results in some heat diffusion and global warming. A modified Wilson plot, known as a photoWilson plot (Fig. S12), is then used to estimate the laser-induced temperature increase due to heat dissipation, in a similar way as described above for the temperature-Wilson plots. From the photoWilson plot, it is possible to calculate the variation of the isotropic temperature factor ( $\Delta B$ )<sup>6</sup>:

$$\ln\left(\frac{I^{dt}}{I^{dt<0}}\right) = -2\Delta B^{dt-dt<0}(\sin\theta/\lambda)^2 \quad (\text{S3})$$

where  $I_{\text{ON}}$  and  $I_{\text{OFF}}$  are the laser-ON and laser-OFF intensities. Note that, in both cases, intensities must be brought to the same scale before calculating the value of  $\Delta B$ .

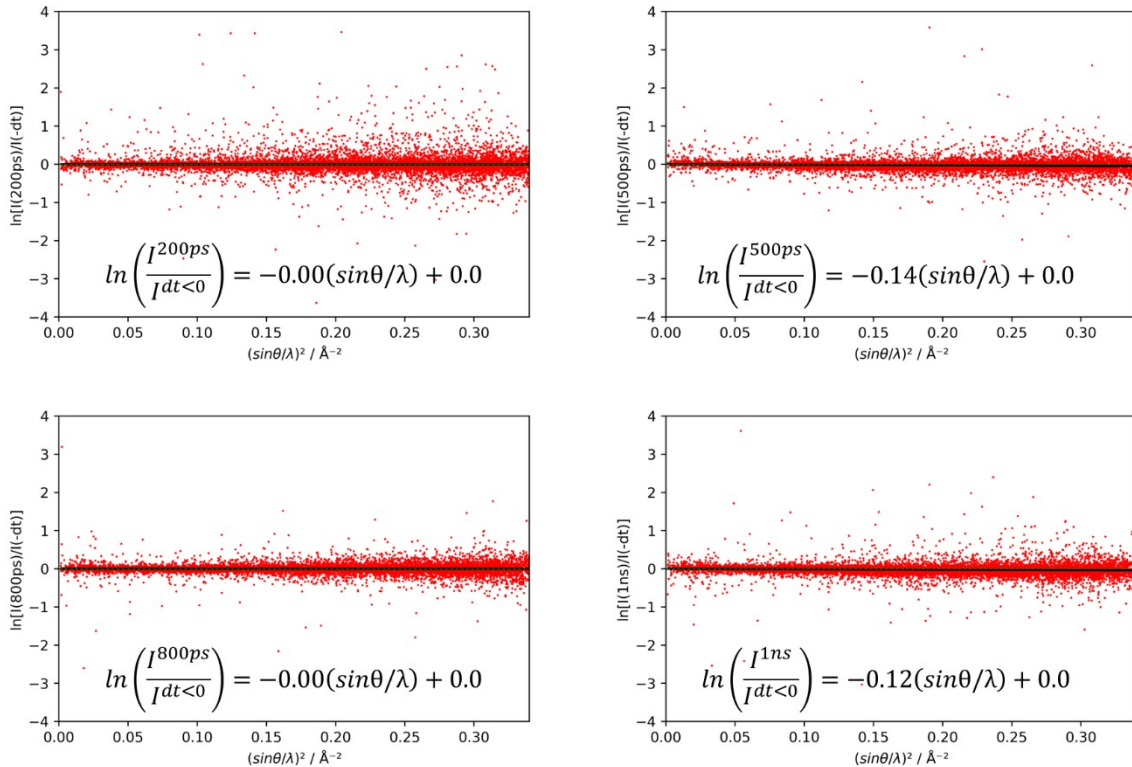

Figure S12. PhotoWilson plots of **FE3**.

## Distortion

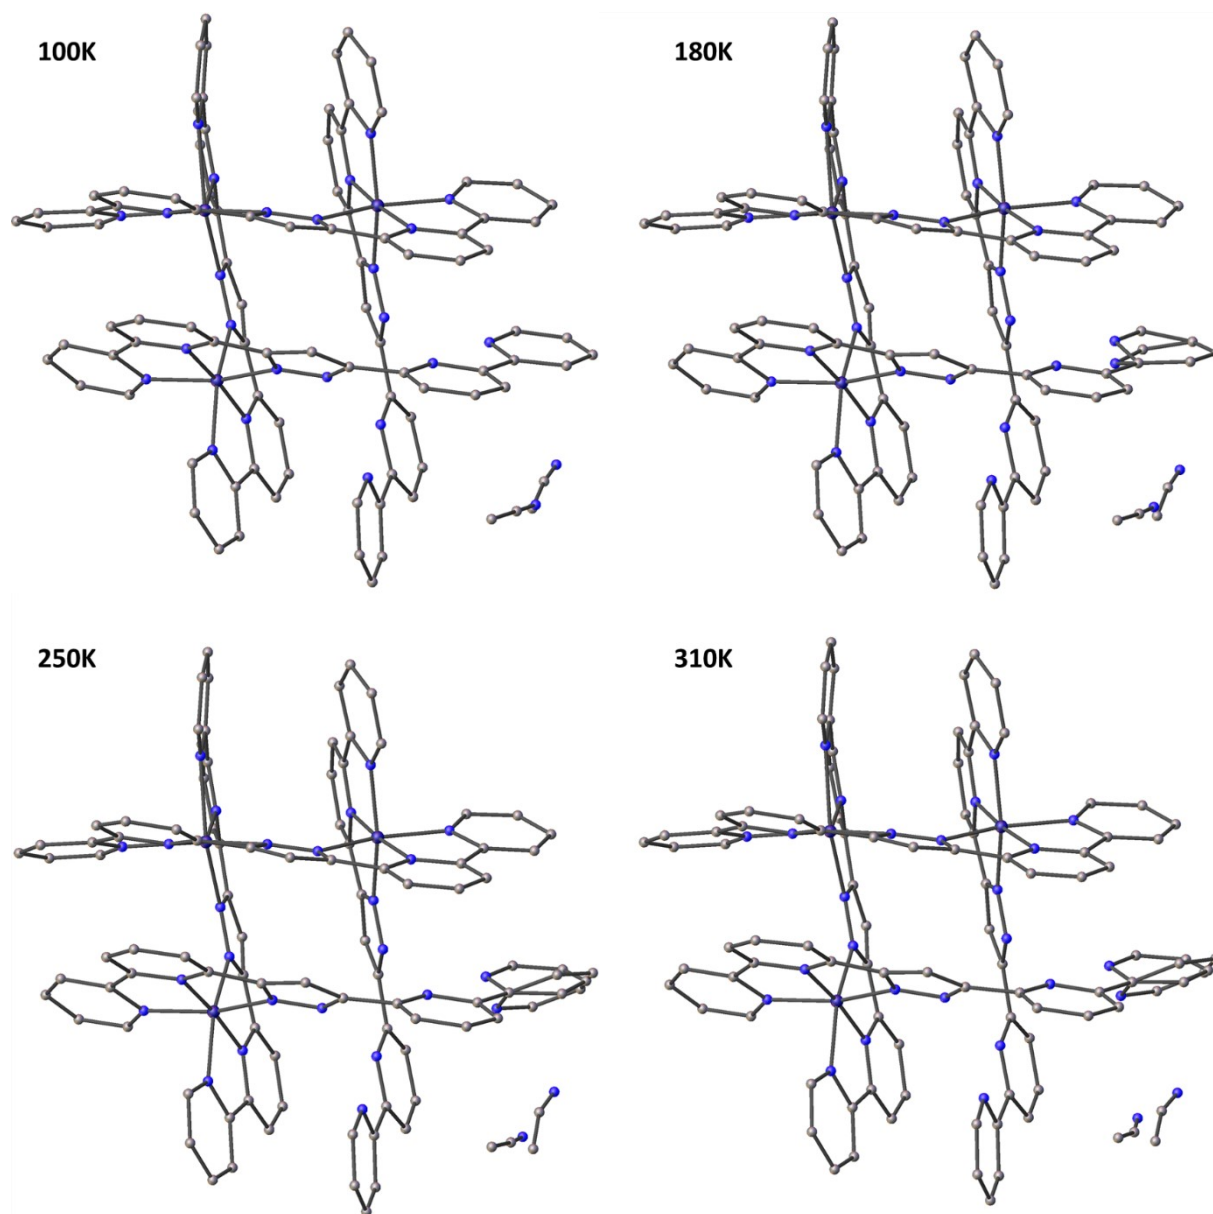

Figure S13. Molecular representation of the  $[\text{Fe}_3\text{L}_4]^{4+}$  grid at different temperatures, showing the rotation of the pyridine ring and the nearest acetonitrile molecule refined as disordered over two positions.

## Structural Details

Table S3. Structural data that provides a basic description of the SCO in **FE3**.

| Structural parameter             | 100K                                                                                | 250K                                                                                 | 310K        |
|----------------------------------|-------------------------------------------------------------------------------------|--------------------------------------------------------------------------------------|-------------|
| <i>Fe(A)</i>                     |                                                                                     |                                                                                      |             |
| <Fe-N> (Å)                       | 1.966 (2)                                                                           | 1.968 (2)                                                                            | 1.974 (2)   |
| S(Oh)                            | 2.256                                                                               | 2.290                                                                                | 2.332       |
| S(itp)                           | 11.159                                                                              | 11.060                                                                               | 10.968      |
| $\Sigma$ (°)                     | 95.44                                                                               | 93.89                                                                                | 95.12       |
| $\Theta$ (°)                     | 306.06                                                                              | 310.54                                                                               | 313.53      |
| $\zeta$ (Å)                      | 0.234                                                                               | 0.232                                                                                | 0.231       |
| V <sub>p</sub> (Å <sup>3</sup> ) | 9.771                                                                               | 9.797                                                                                | 9.877       |
| <i>Fe(B)</i>                     |                                                                                     |                                                                                      |             |
| <Fe-N> (Å)                       | 1.959 (2)                                                                           | 1.964 (2)                                                                            | 1.968 (3)   |
| S(Oh)                            | 2.183                                                                               | 2.198                                                                                | 2.284       |
| S(itp)                           | 11.201                                                                              | 11.027                                                                               | 10.904      |
| $\Sigma$ (°)                     | 94.70                                                                               | 92.75                                                                                | 93.71       |
| $\Theta$ (°)                     | 301.94                                                                              | 302.60                                                                               | 310.47      |
| $\zeta$ (Å)                      | 0.243                                                                               | 0.242                                                                                | 0.220       |
| V <sub>p</sub> (Å <sup>3</sup> ) | 9.687                                                                               | 9.750                                                                                | 9.802       |
| <i>Fe(C)</i>                     |                                                                                     |                                                                                      |             |
| <Fe-N> (Å)                       | 2.183 (2)                                                                           | 2.187 (2)                                                                            | 2.188 (3)   |
| S(Oh)                            | 6.140                                                                               | 6.156                                                                                | 6.160       |
| S(itp)                           | 6.475                                                                               | 6.572                                                                                | 6.495       |
| $\Sigma$ (°)                     | 146.93                                                                              | 146.36                                                                               | 145.31      |
| $\Theta$ (°)                     | 577.25                                                                              | 576.38                                                                               | 575.71      |
| $\zeta$ (Å)                      | 0.401                                                                               | 0.396                                                                                | 0.394       |
| V <sub>p</sub> (Å <sup>3</sup> ) | 12.285                                                                              | 12.356                                                                               | 12.388      |
| <i>Molecular Scale</i>           |                                                                                     |                                                                                      |             |
| Superposition of structures      | 100K (blue) & 250 K (red)                                                           | 100K (blue) & 310 K (red)                                                            |             |
|                                  | 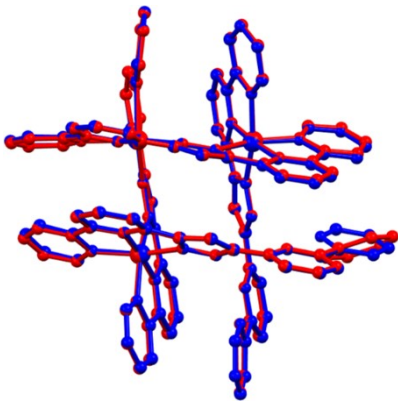 |  |             |
| Maximum RMSD                     | 1.1862                                                                              | 0.8101                                                                               |             |
| Average RMSD                     | 0.1925                                                                              | 0.1965                                                                               |             |
| <i>Unit cell Changes</i>         |                                                                                     |                                                                                      |             |
| <i>a</i> (Å)                     | 14.010 (3)                                                                          | 14.150 (3)                                                                           | 14.240 (3)  |
| <i>b</i> (Å)                     | 14.480 (3)                                                                          | 14.590 (3)                                                                           | 14.630 (3)  |
| <i>c</i> (Å)                     | 24.320 (5)                                                                          | 24.710 (5)                                                                           | 24.860 (5)  |
| V (Å <sup>3</sup> )              | 4667.1 (18)                                                                         | 4797.6 (19)                                                                          | 4863.8 (19) |
| <i>Crystal packing</i>           |                                                                                     |                                                                                      |             |

|                                             |                                                                                   |                                                                                    |                                                                                     |
|---------------------------------------------|-----------------------------------------------------------------------------------|------------------------------------------------------------------------------------|-------------------------------------------------------------------------------------|
| Intermolecular interactions (Å)             | 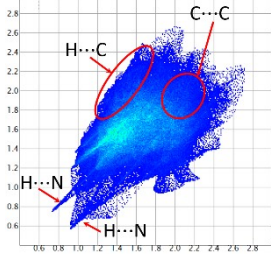 |  |  |
| Separation between $\pi$ - $\pi$ planes (Å) | 4.224, 4.837                                                                      | 4.356, 5.014                                                                       | 4.425, 5.076                                                                        |
| Crystal density                             | 1.553                                                                             | 1.511                                                                              | 1.484                                                                               |

$\Sigma = \sum_{i=1}^{12} |90 - \phi_i|$ , the sum of the angular deviations from  $90^\circ$  for the 12 cis angles ( $\phi_i$ )<sup>7,8</sup>,  $\Theta = \sum_{i=1}^{24} |60 - \theta_i|^2$ ,  $\zeta = (\text{Fe-N}_i) - \langle \text{Fe-N} \rangle$ <sup>9</sup>. Information about  $\Theta$ , S(Oh) and S(itp) is provided in the structural analysis section.

## References

- 1 R. Ketkaew, Y. Tantirungrotechai, P. Harding, G. Chastanet, P. Guionneau, M. Marchivie and D. J. Harding, *Dalton Trans*, 2021, **50**, 1086–1096.
- 2 M. Marchivie, P. Guionneau, J.-F. Létard and D. Chasseau, *Acta Crystallogr. B*, 2005, **61**, 25–28.
- 3 M. Marchivie, P. Guionneau, J.-F. Létard and D. Chasseau, *Acta Crystallogr. B*, 2003, **59**, 479–486.
- 4 H. Zabrodsky, S. Peleg and D. Avnir, *J. Am. Chem. Soc.*, 1992, **114**, 7843–7851.
- 5 M. Llunell, D. Casanova, J. Cirera, P. Alemany and S. Alvarez, *SHAPE program, version 2.1*, Barcelona, 2003.
- 6 M. S. Schmökel, R. Kamiński, J. B. Benedict and P. Coppens, *Acta Crystallogr. A*, 2010, **66**, 632–636.
- 7 P. Guionneau, M. Marchivie, G. Bravic, J.-F. Létard and D. Chasseau, in *Spin Crossover in Transition Metal Compounds II*, eds. P. Gütllich and H. A. Goodwin, Springer Berlin Heidelberg, Berlin, Heidelberg, 2004, pp. 97–128.
- 8 M. A. Halcrow, *Chem. Soc. Rev.*, 2011, **40**, 4119.
- 9 M. Buron-Le Cointe, J. Hébert, C. Baldé, N. Moisan, L. Toupet, P. Guionneau, J. F. Létard, E. Freysz, H. Cailleau and E. Collet, *Phys. Rev. B*, , DOI:10.1103/PhysRevB.85.064114.
