# Supplementary figures and images for: Structural dynamics of a thermally silent triiron(ii) spin crossover defect grid complex
Source: Royal Society of Chemistry journal article supplement (doi:10.1039/d3dt02067c), 2023-01-01

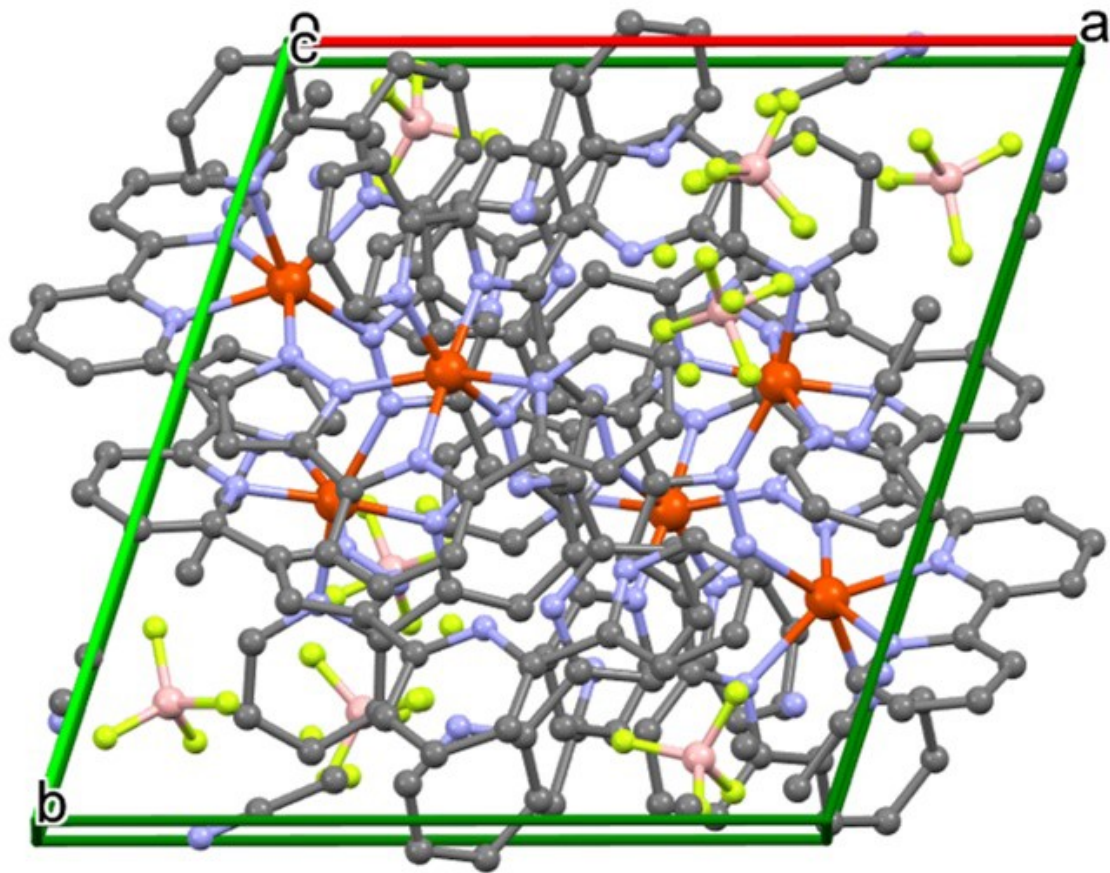

Supplement: d3dt02067c10.pdf [file d3dt02067c10.pdf]

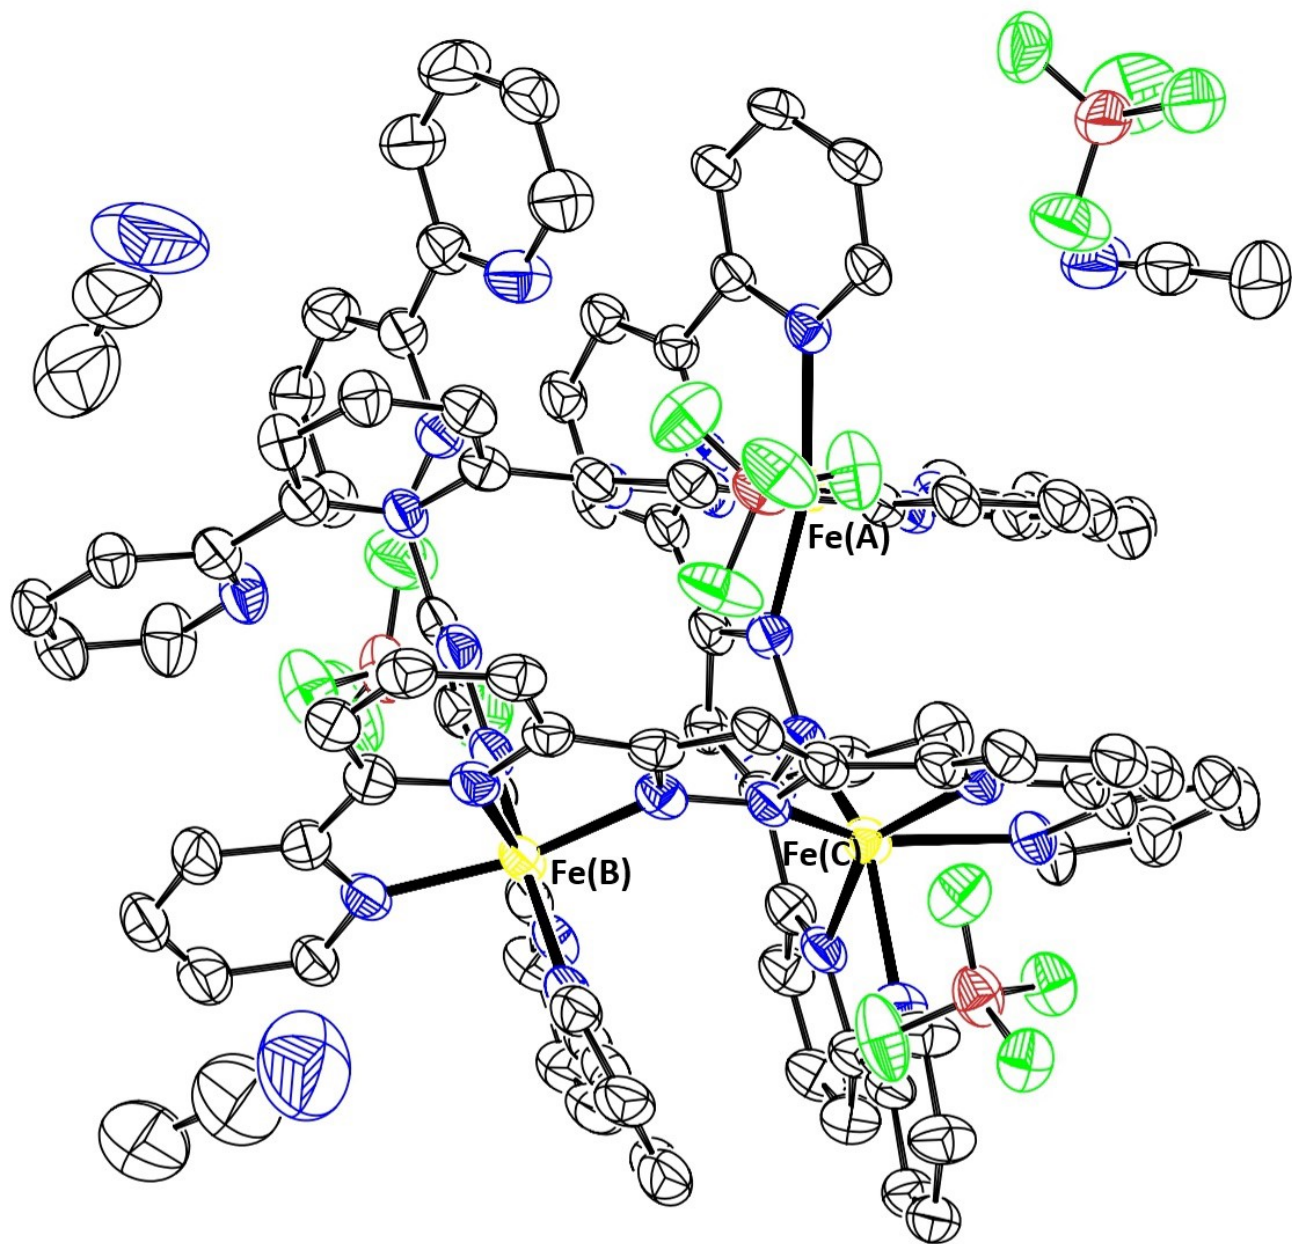

Supplement: d3dt02067c11.pdf [file d3dt02067c11.pdf]

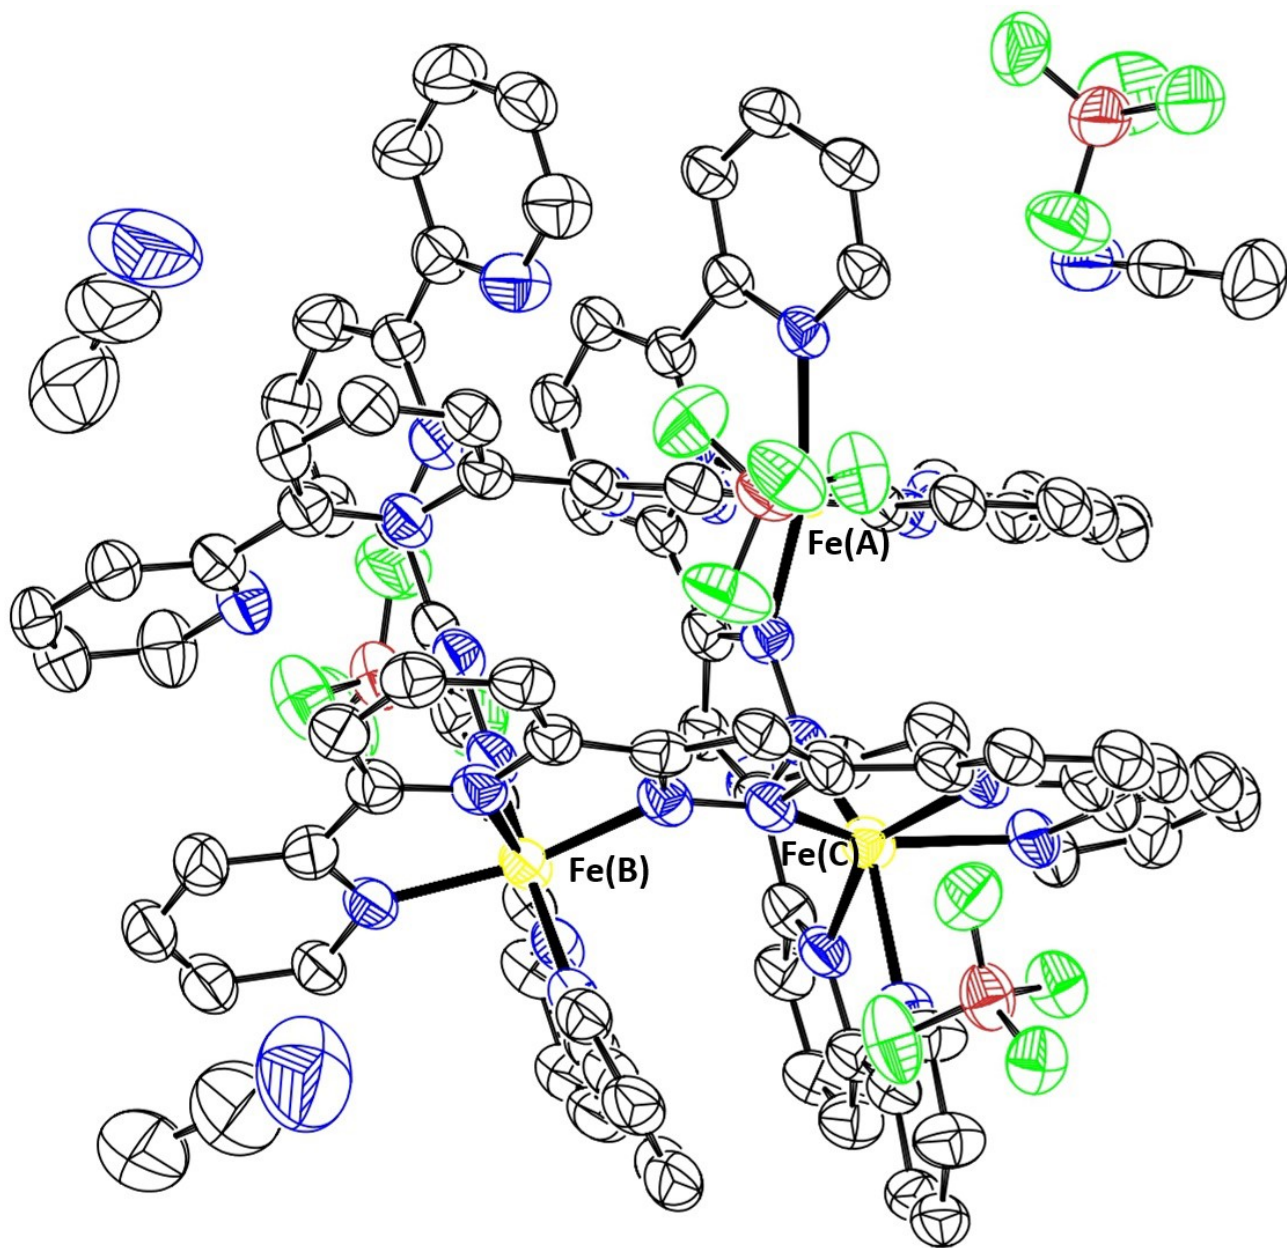

Supplement: d3dt02067c12.pdf [file d3dt02067c12.pdf]

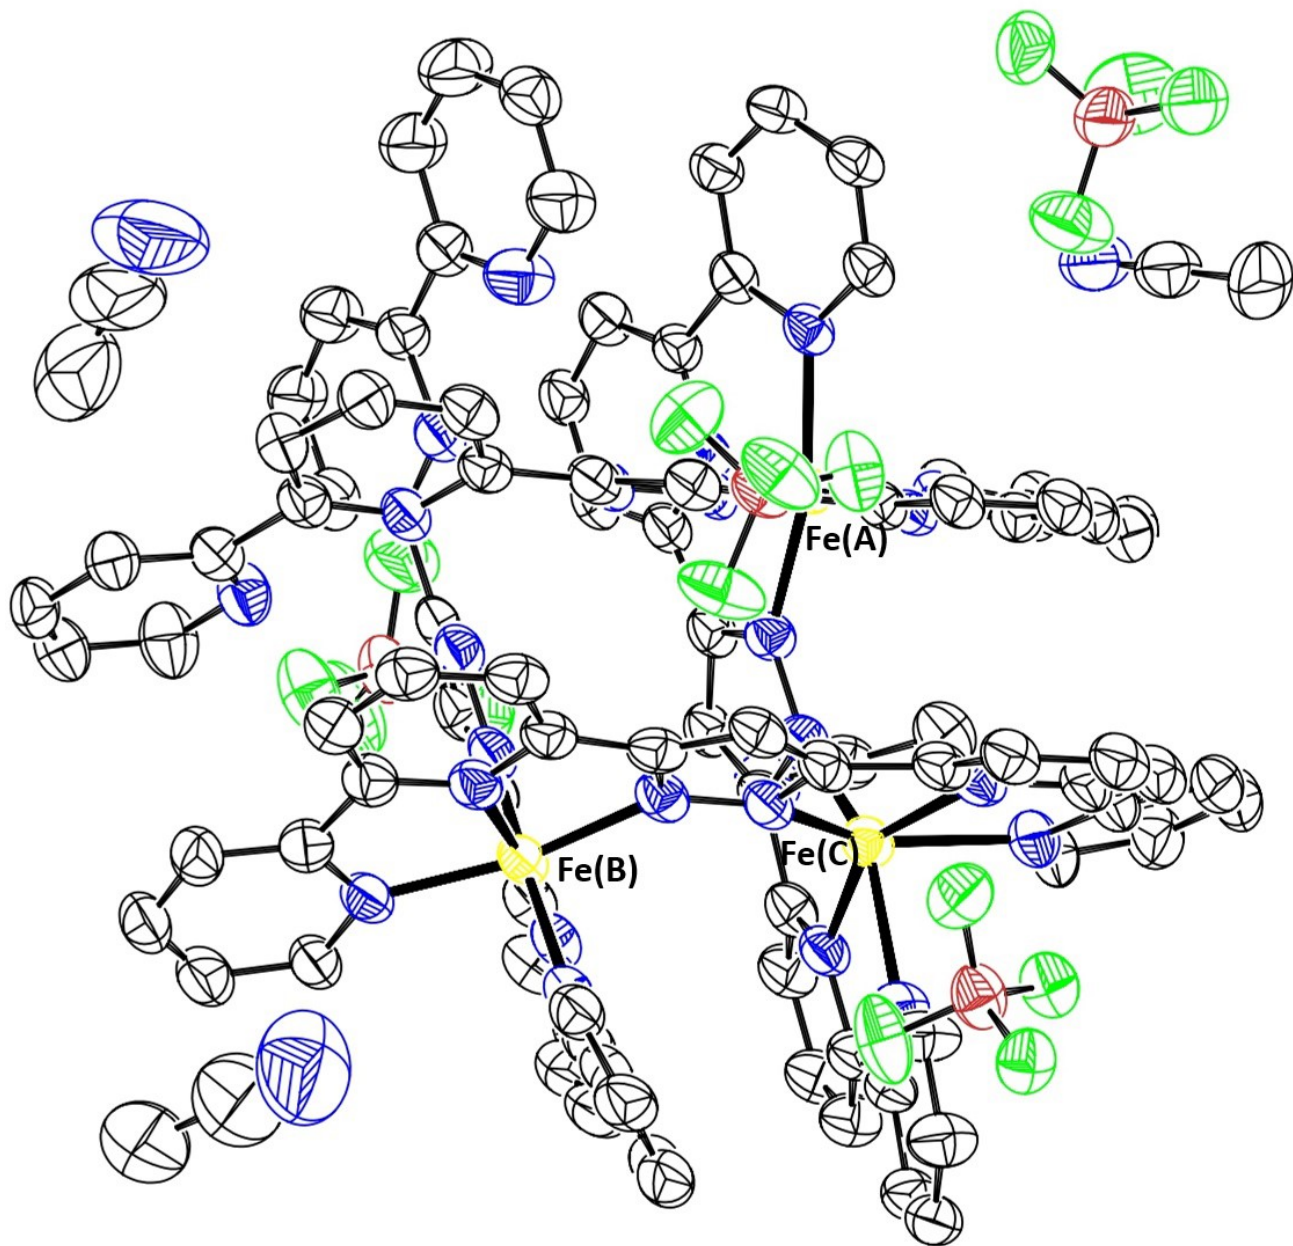

Supplement: d3dt02067c13.pdf [file d3dt02067c13.pdf]

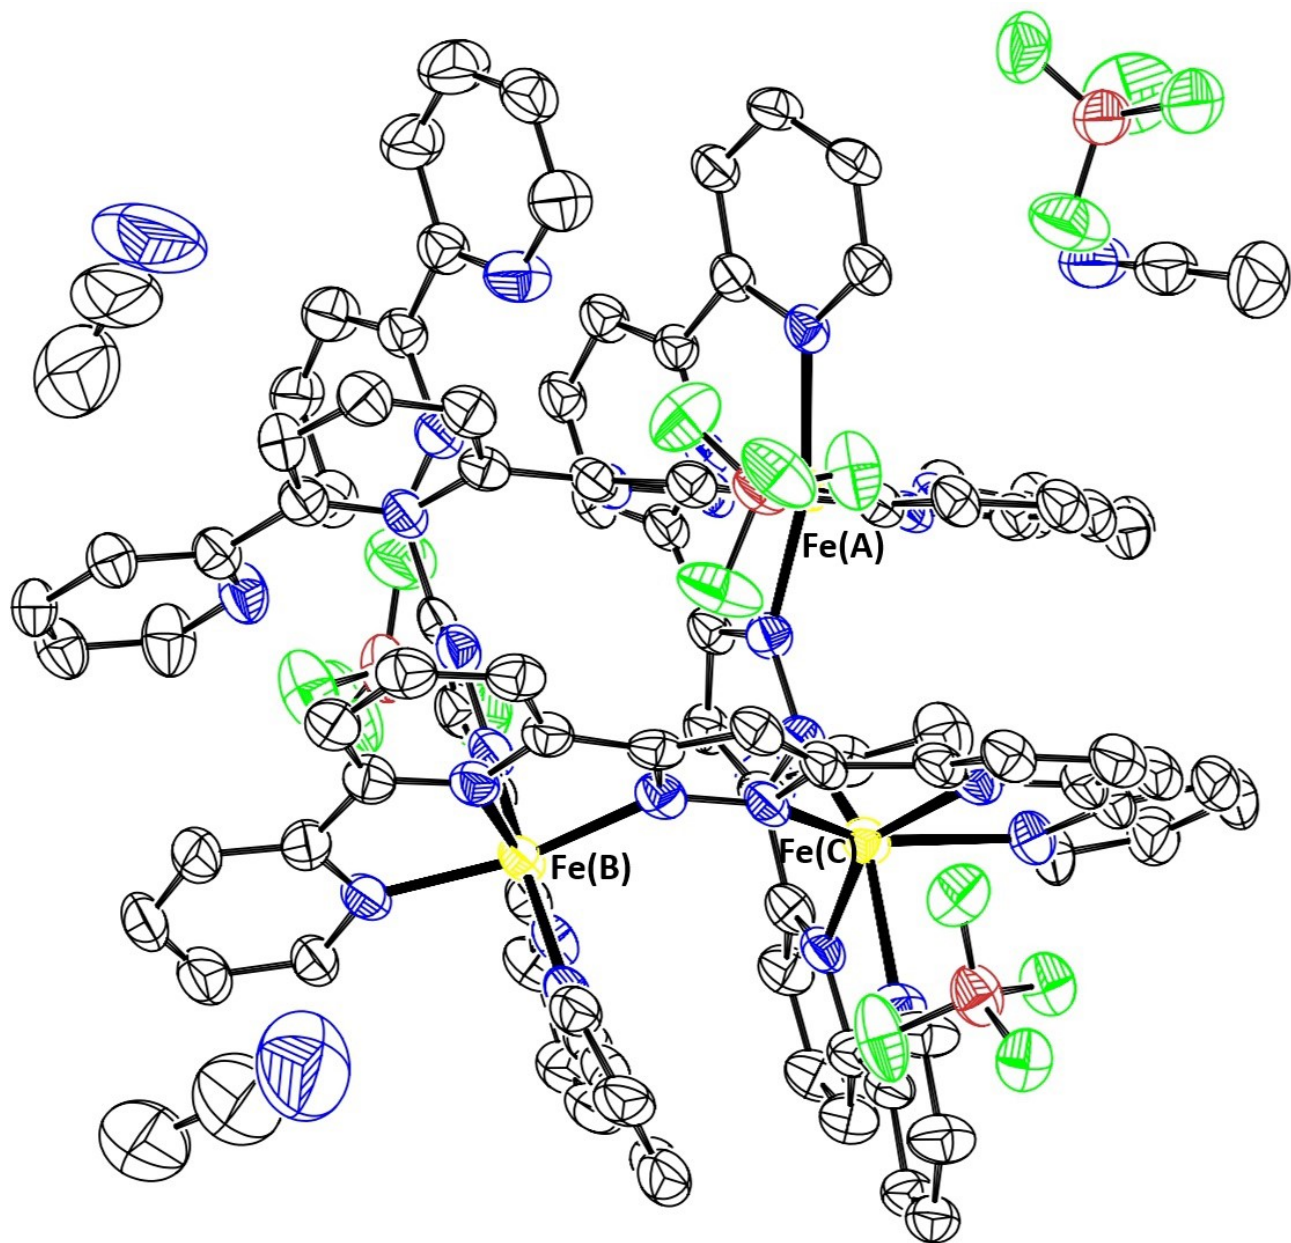

Supplement: d3dt02067c14.pdf [file d3dt02067c14.pdf]

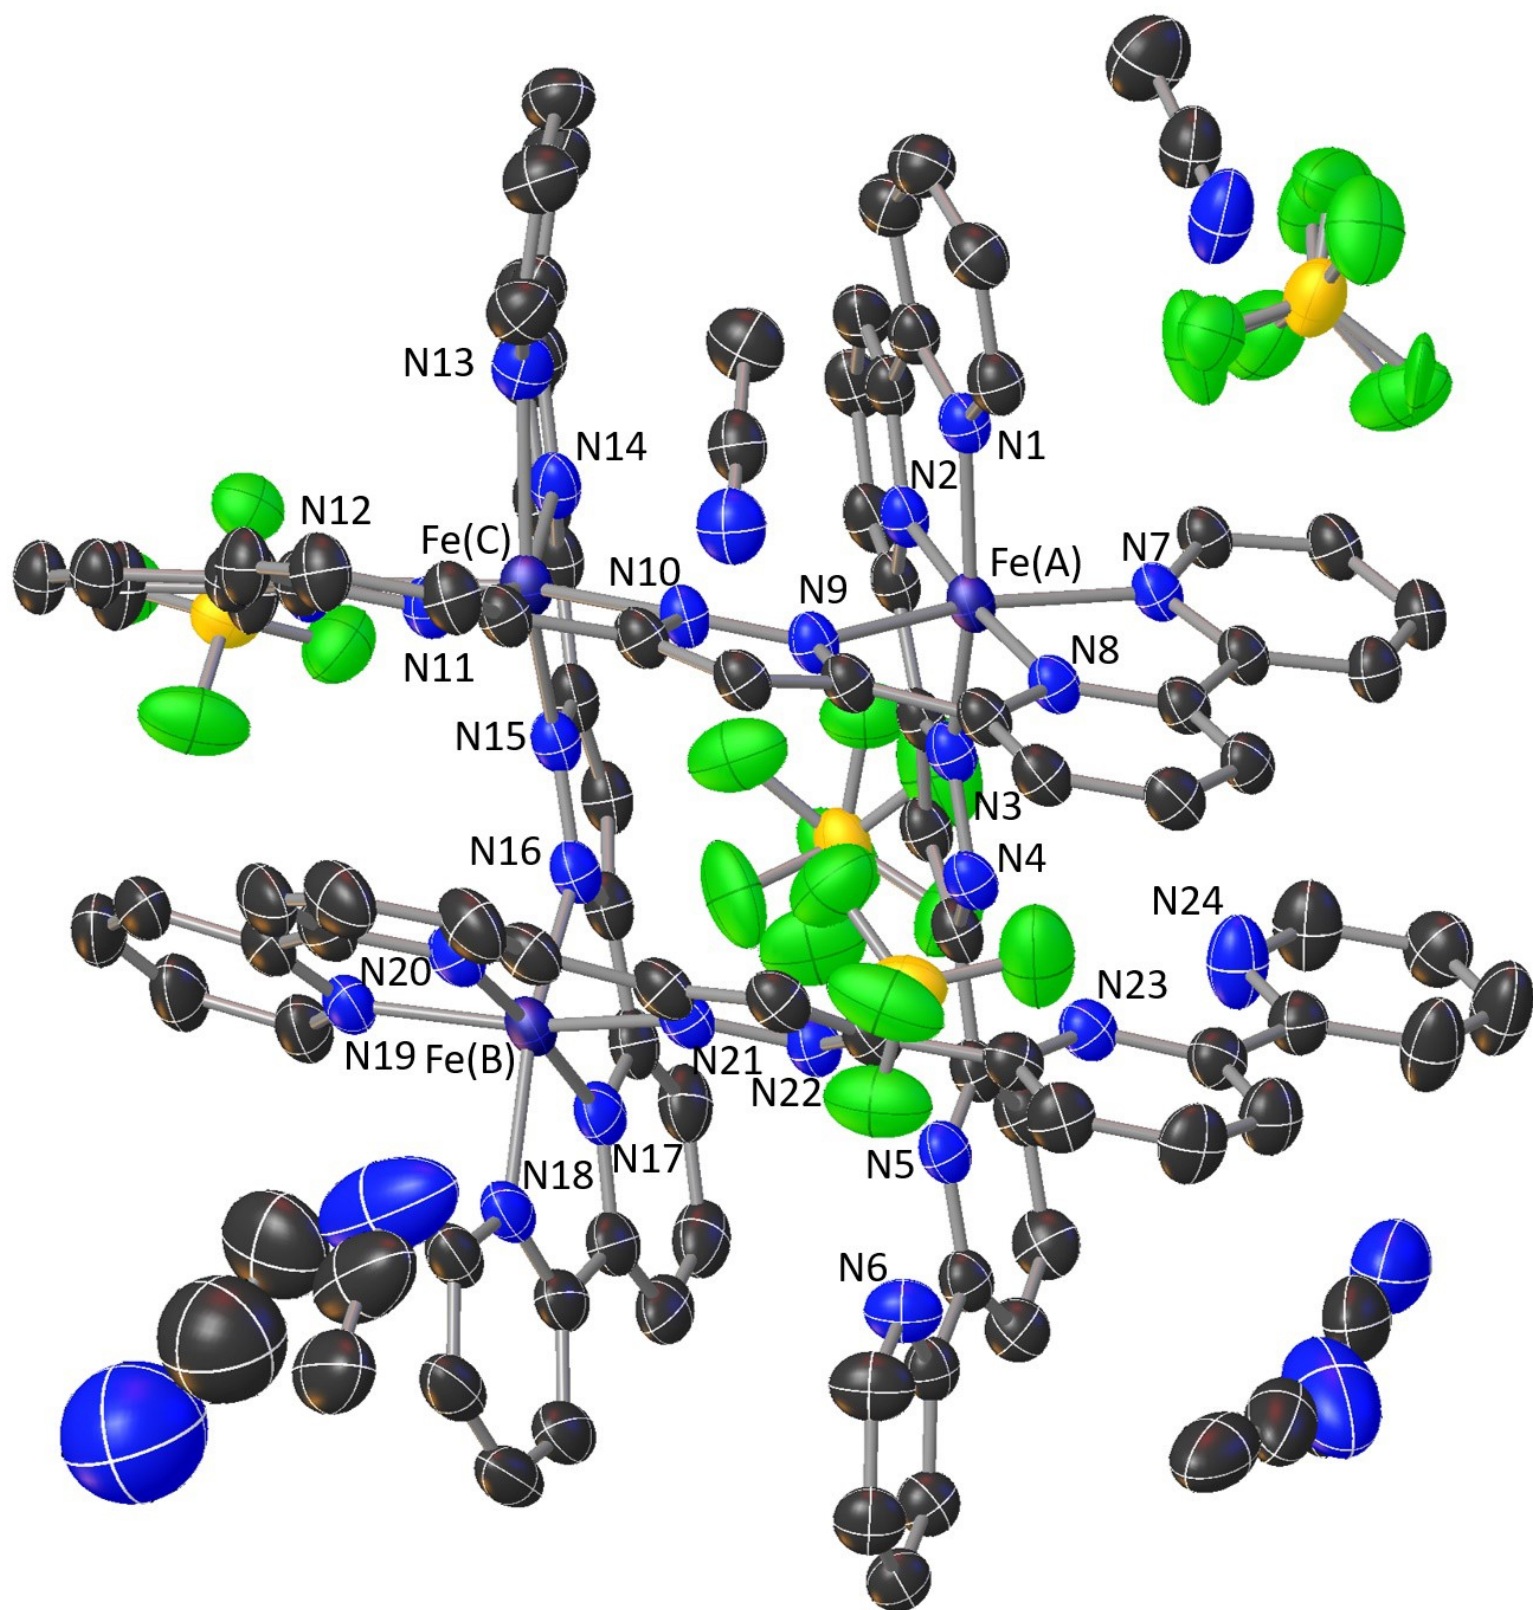

Supplement: d3dt02067c2.pdf [file d3dt02067c2.pdf]

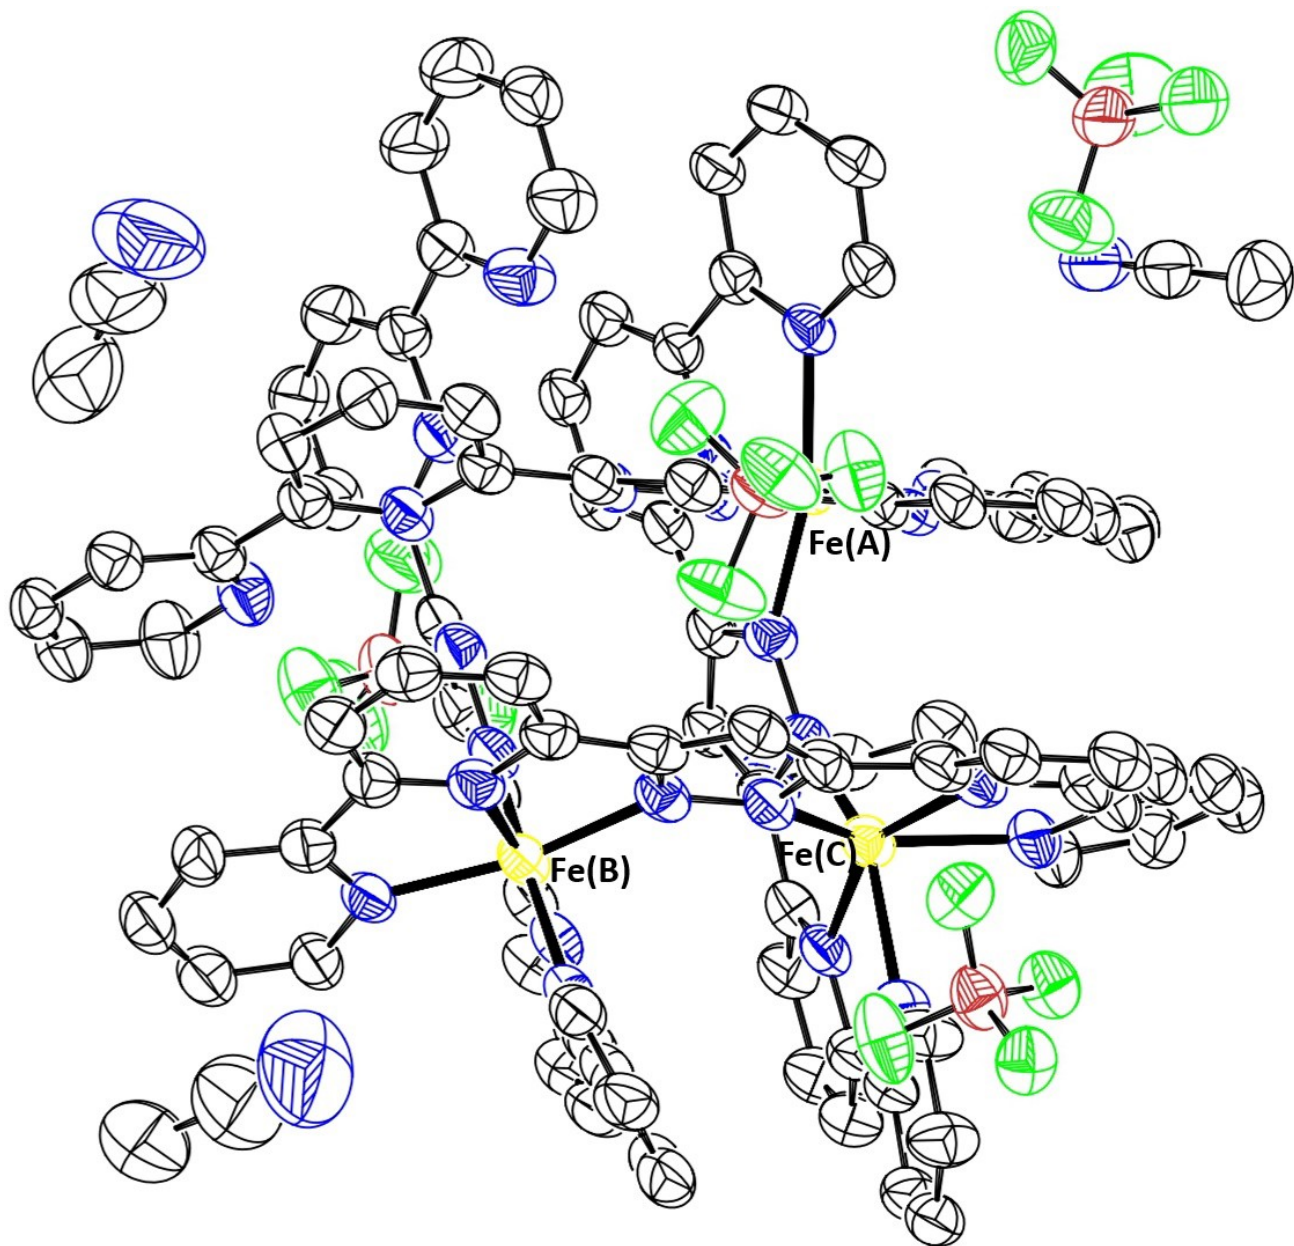

Supplement: d3dt02067c3.pdf [file d3dt02067c3.pdf]

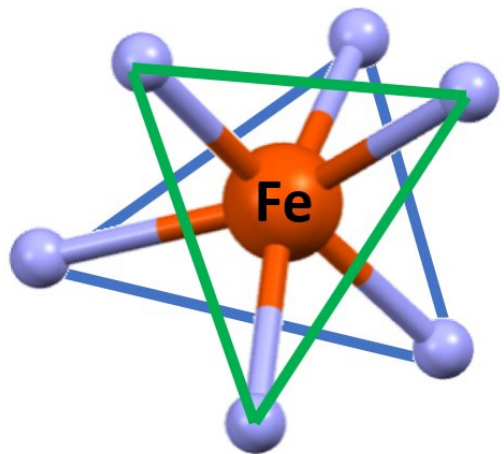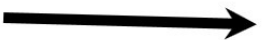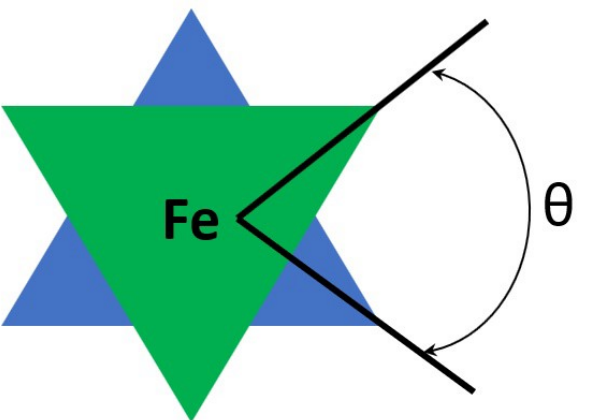

$$\theta = \sum_{i=1}^{24} (|60 - \theta_i|)$$

Supplement: d3dt02067c4.pdf [file d3dt02067c4.pdf]

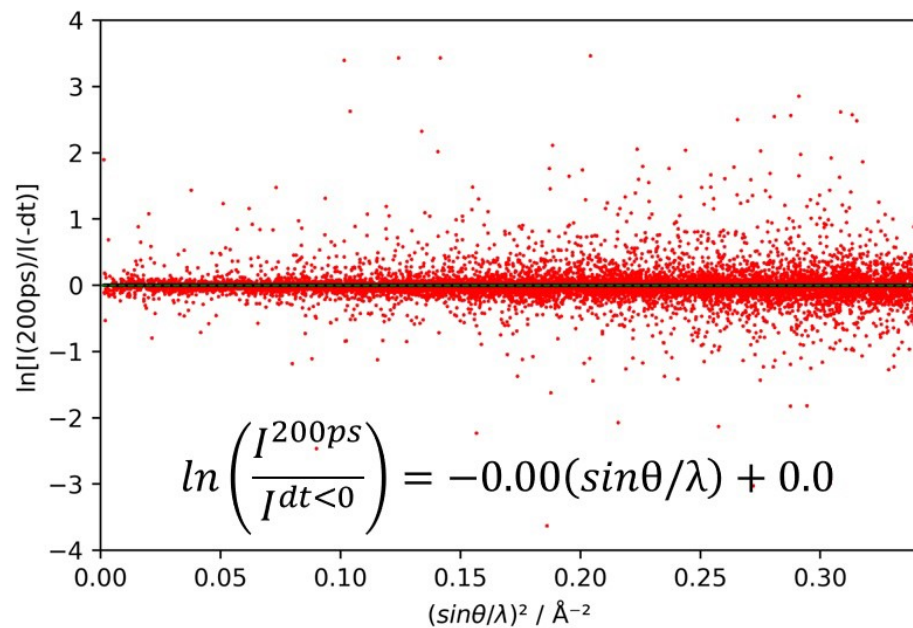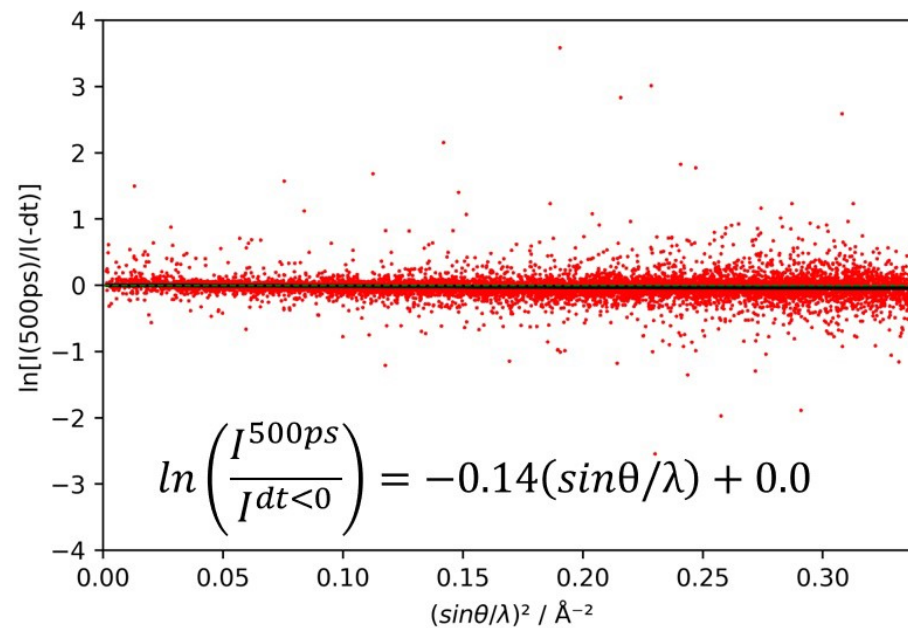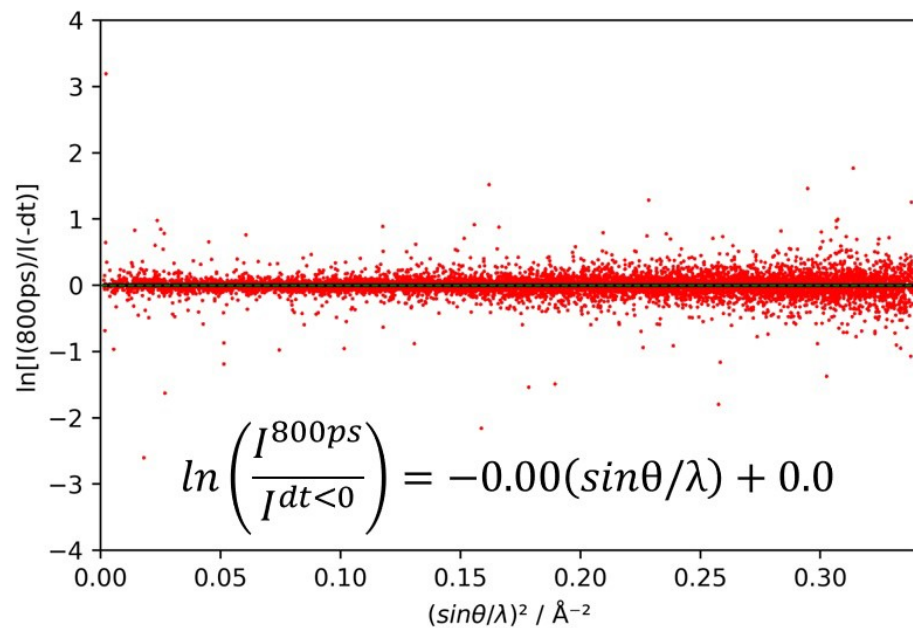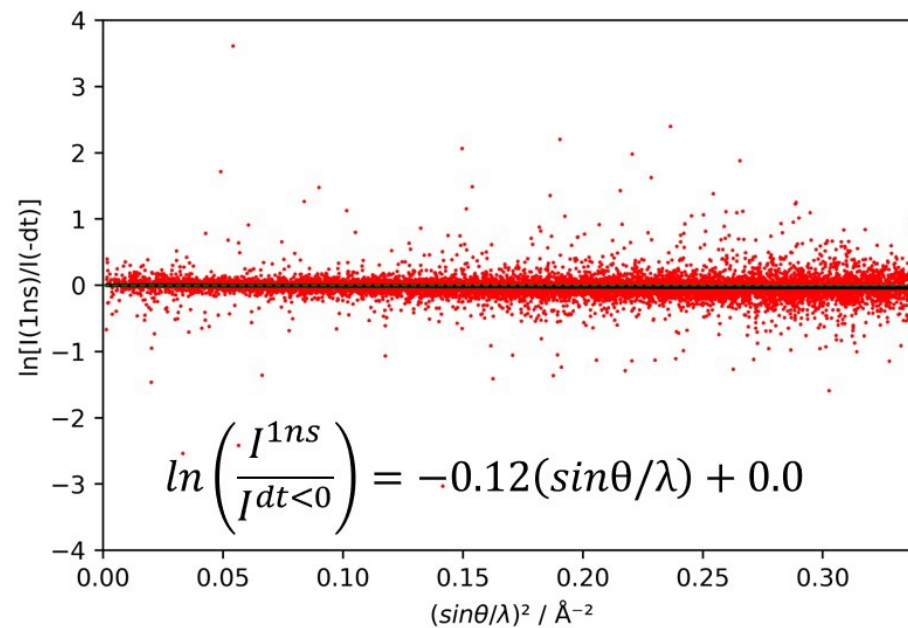

Supplement: d3dt02067c5.pdf [file d3dt02067c5.pdf]

100K

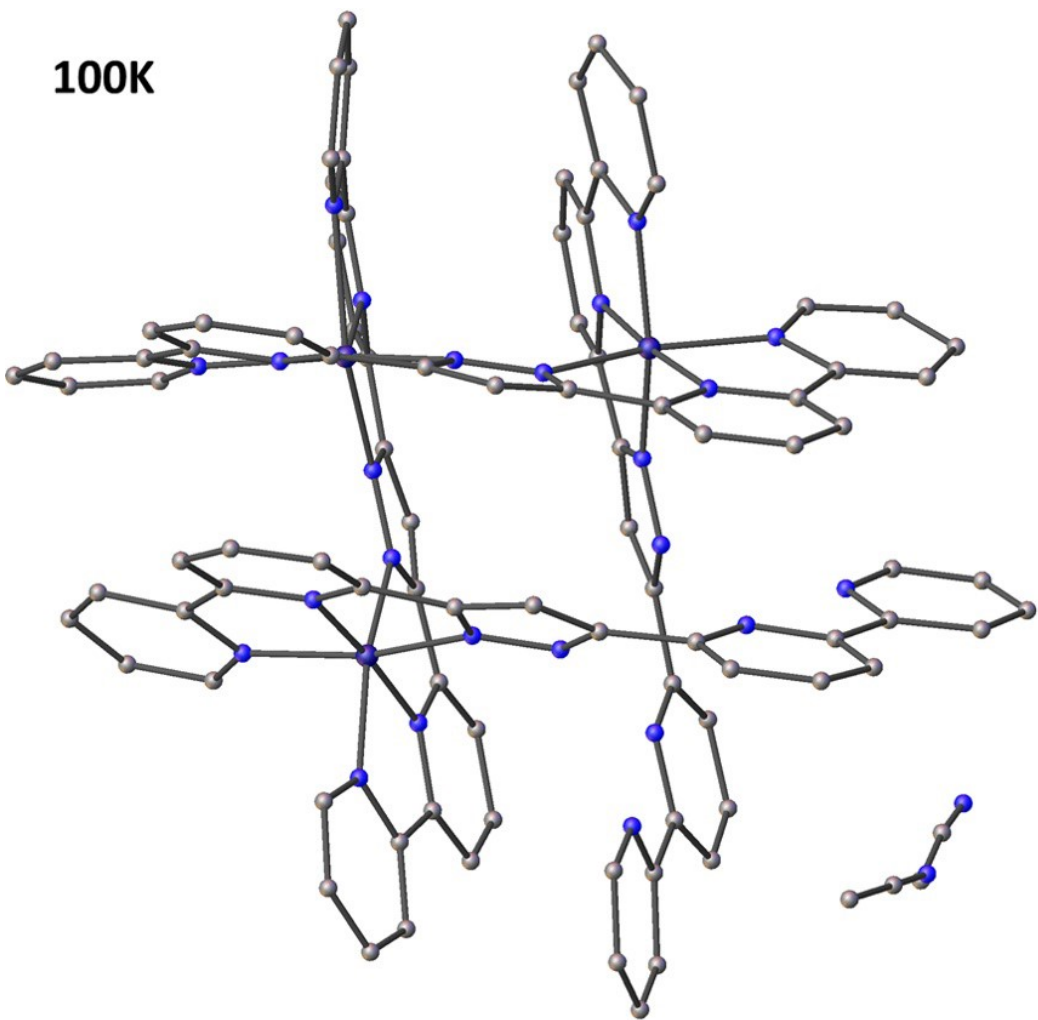

180K

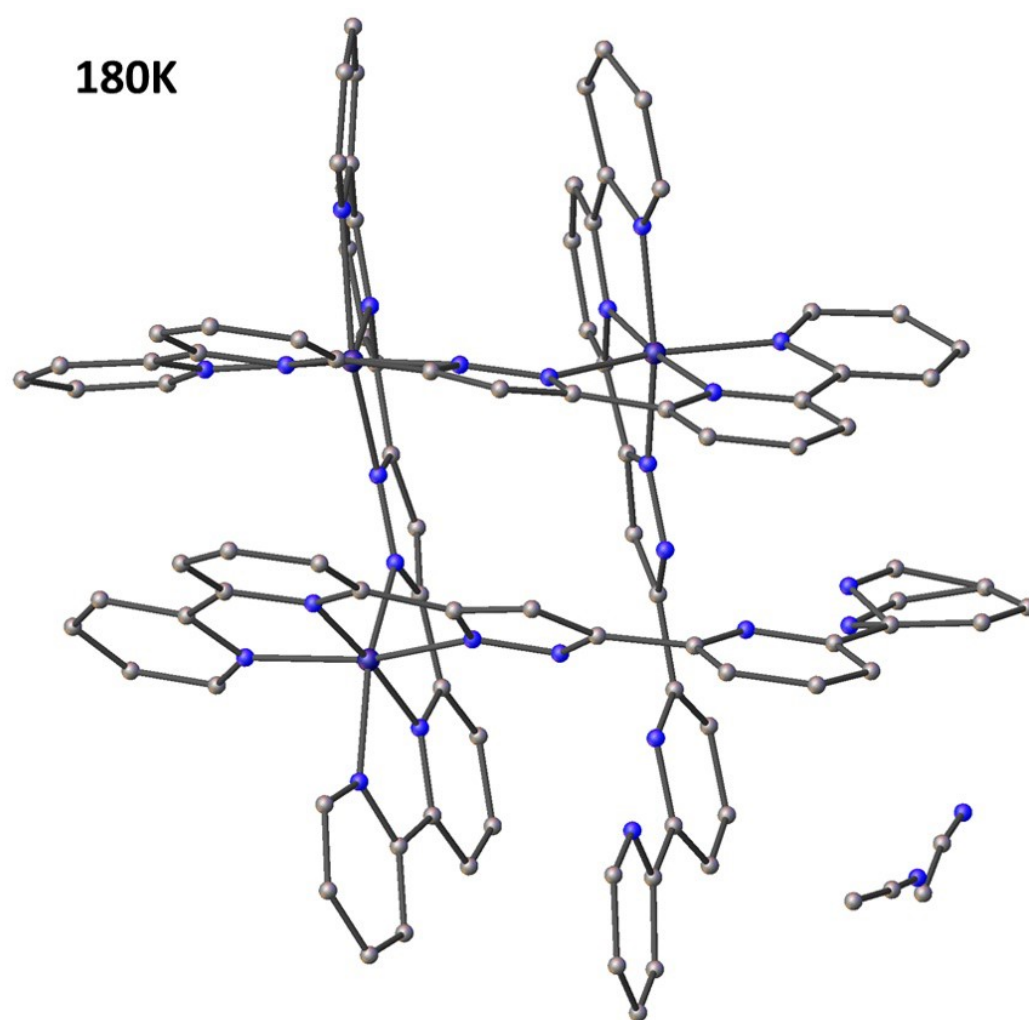

250K

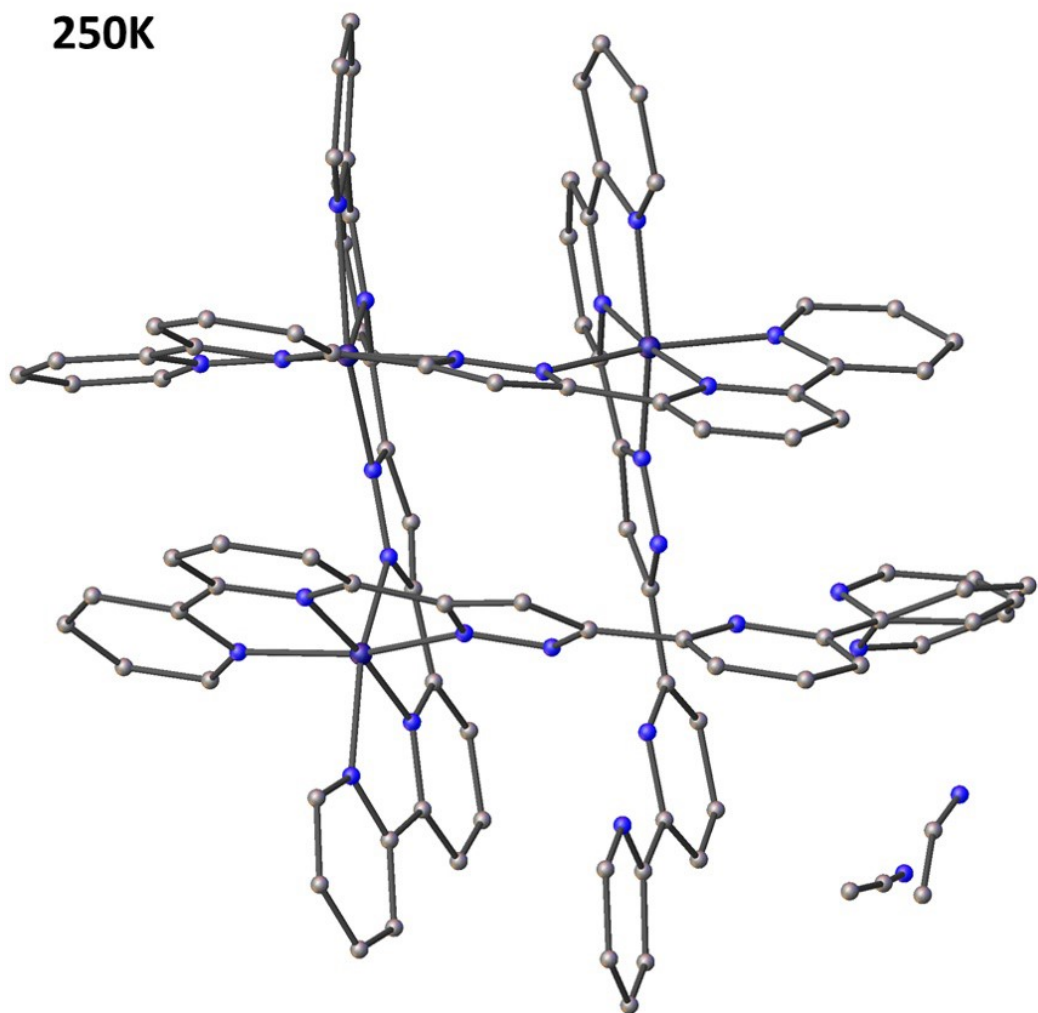

310K

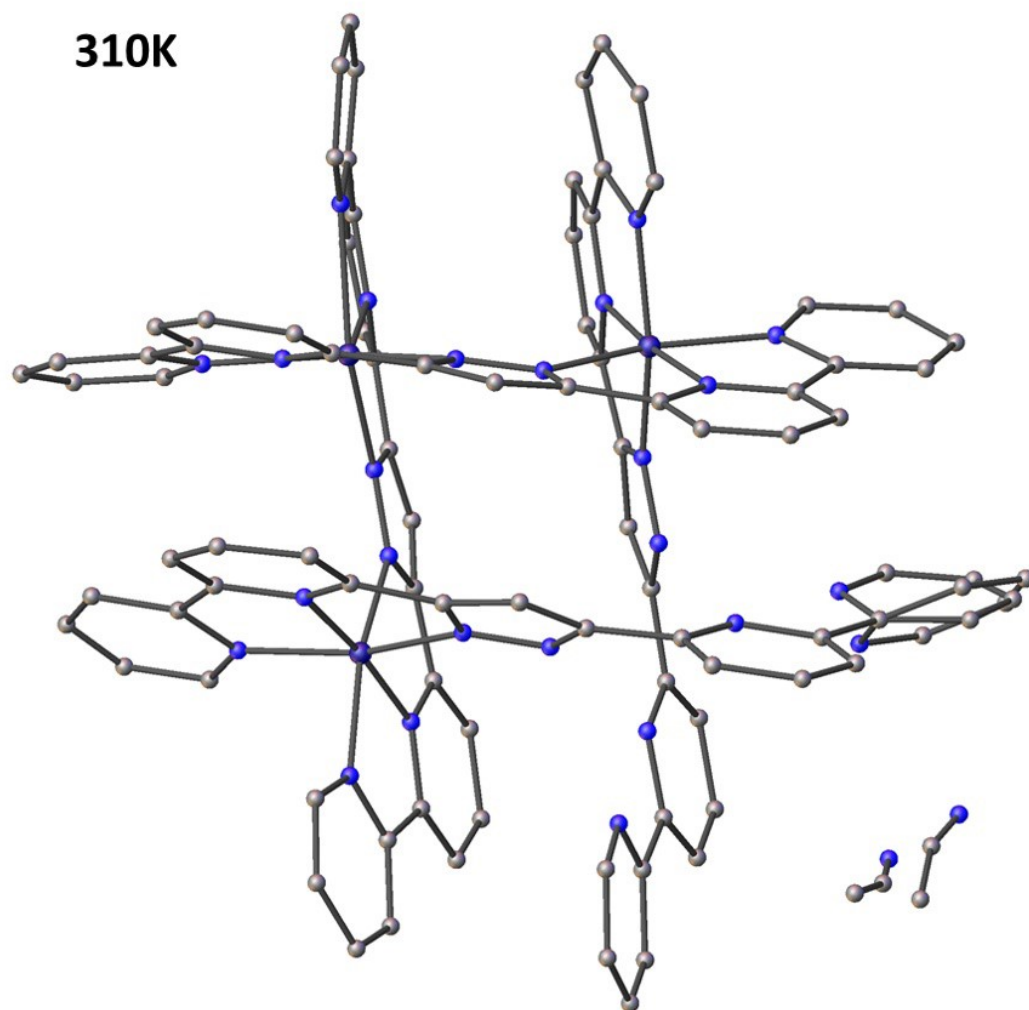

Supplement: d3dt02067c6.pdf [file d3dt02067c6.pdf]

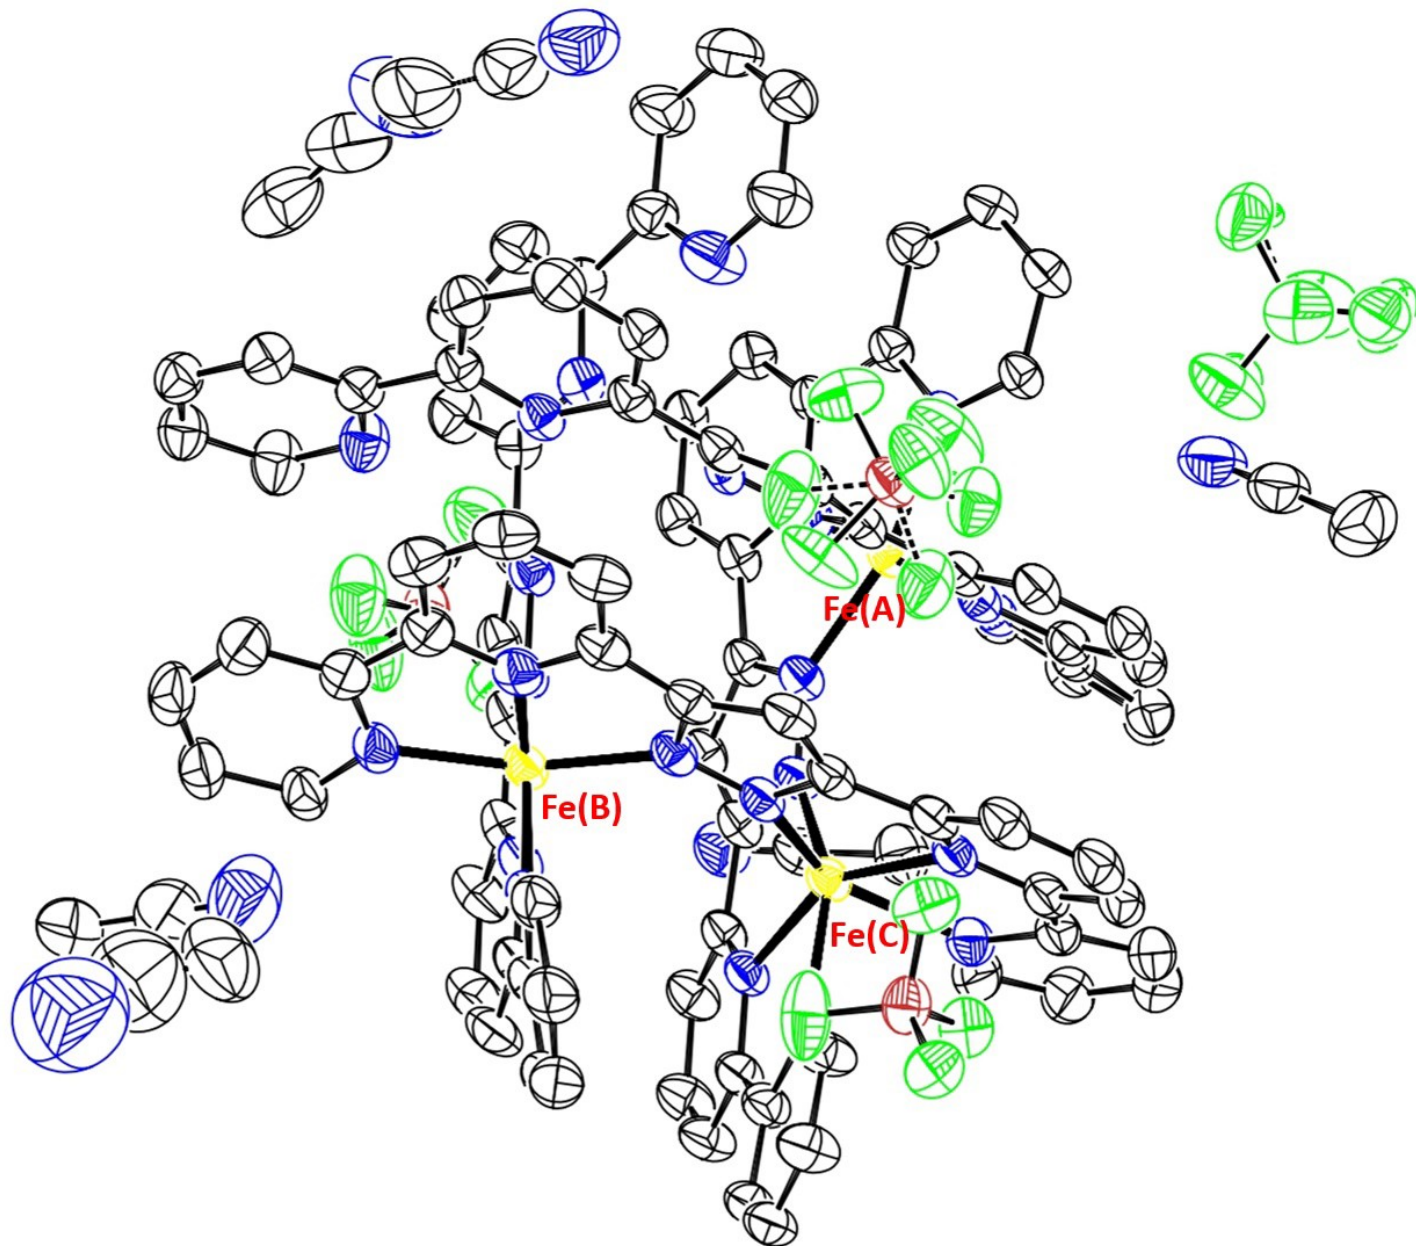

Supplement: d3dt02067c7.pdf [file d3dt02067c7.pdf]

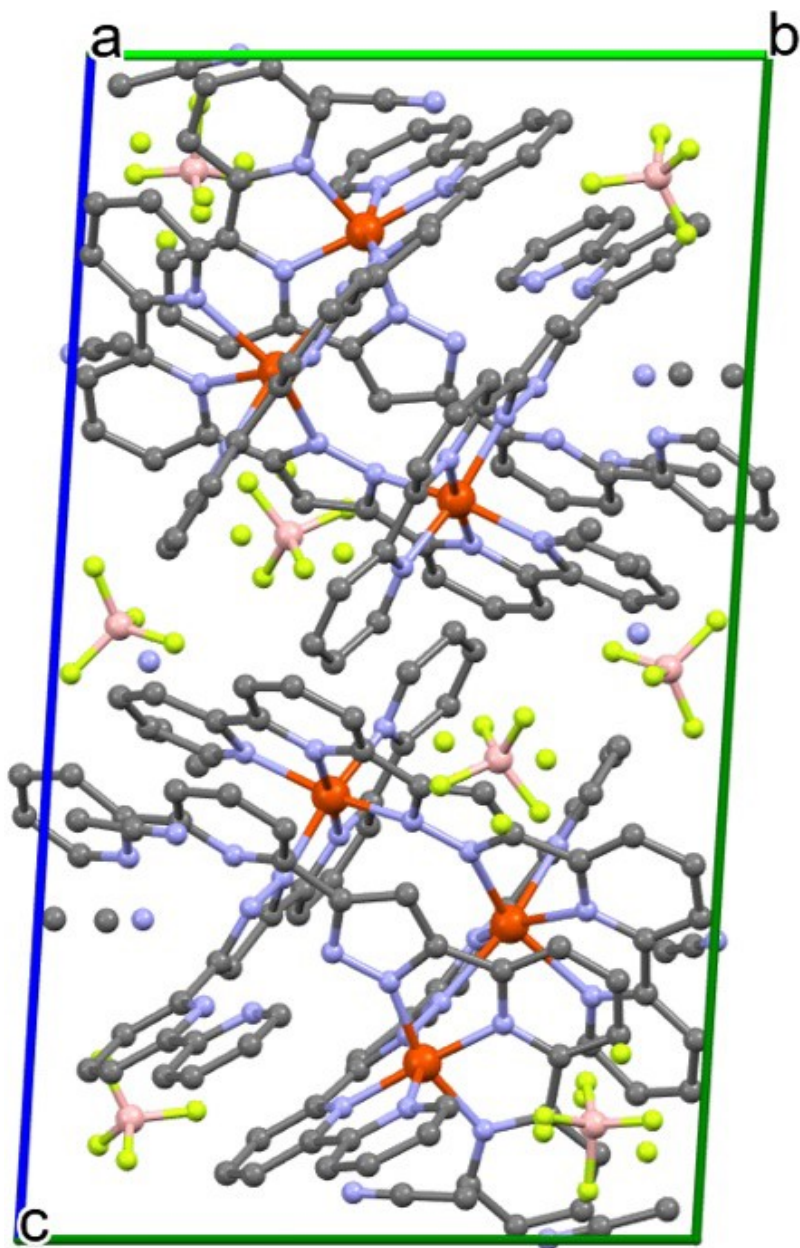

Supplement: d3dt02067c8.pdf [file d3dt02067c8.pdf]

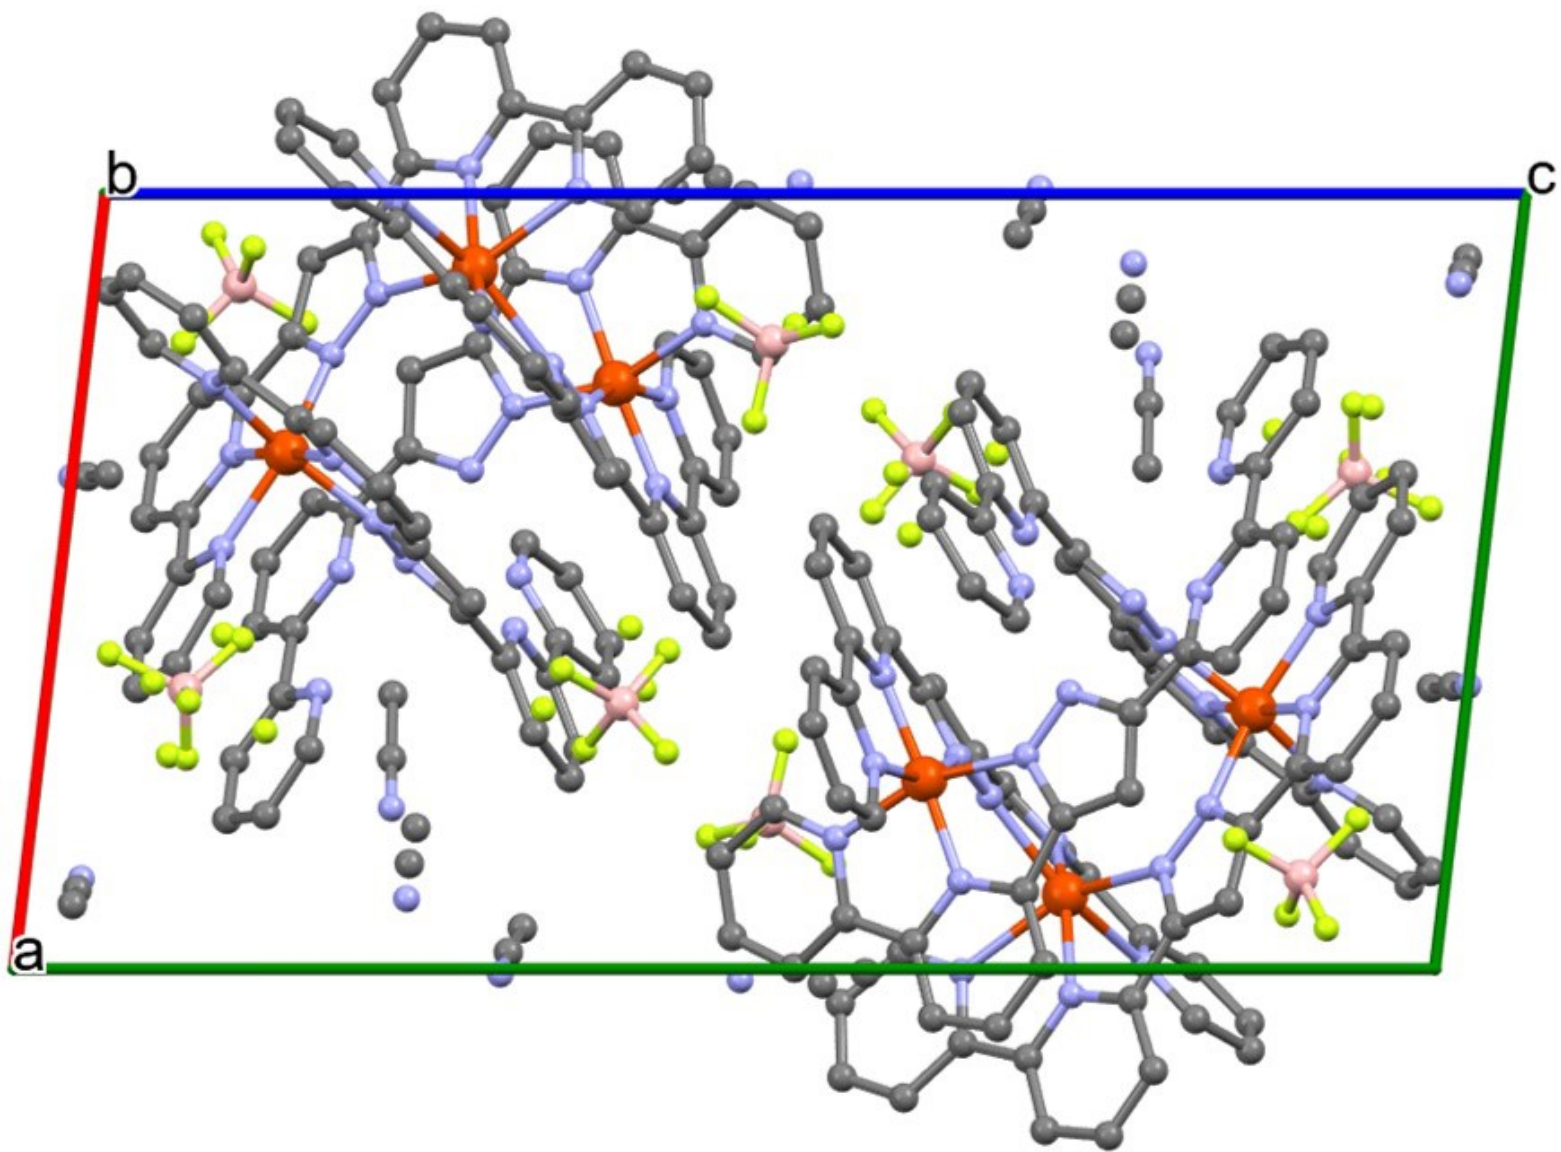

Supplement: d3dt02067c9.pdf [file d3dt02067c9.pdf]
